# Supplementary figures and images for: Synthesis of 2-substituted indolines using sequential Pd-catalyzed processesElectronic supplementary information (ESI) available: 1H and 13C NMR spectra for all products without elemental analysis data (3c–g and 4d–g). See http://www.rsc.org/suppdata/p1/b2/b200163b/
Source: Royal Society of Chemistry journal article supplement (doi:10.1039/b200163b), 2002-02-25

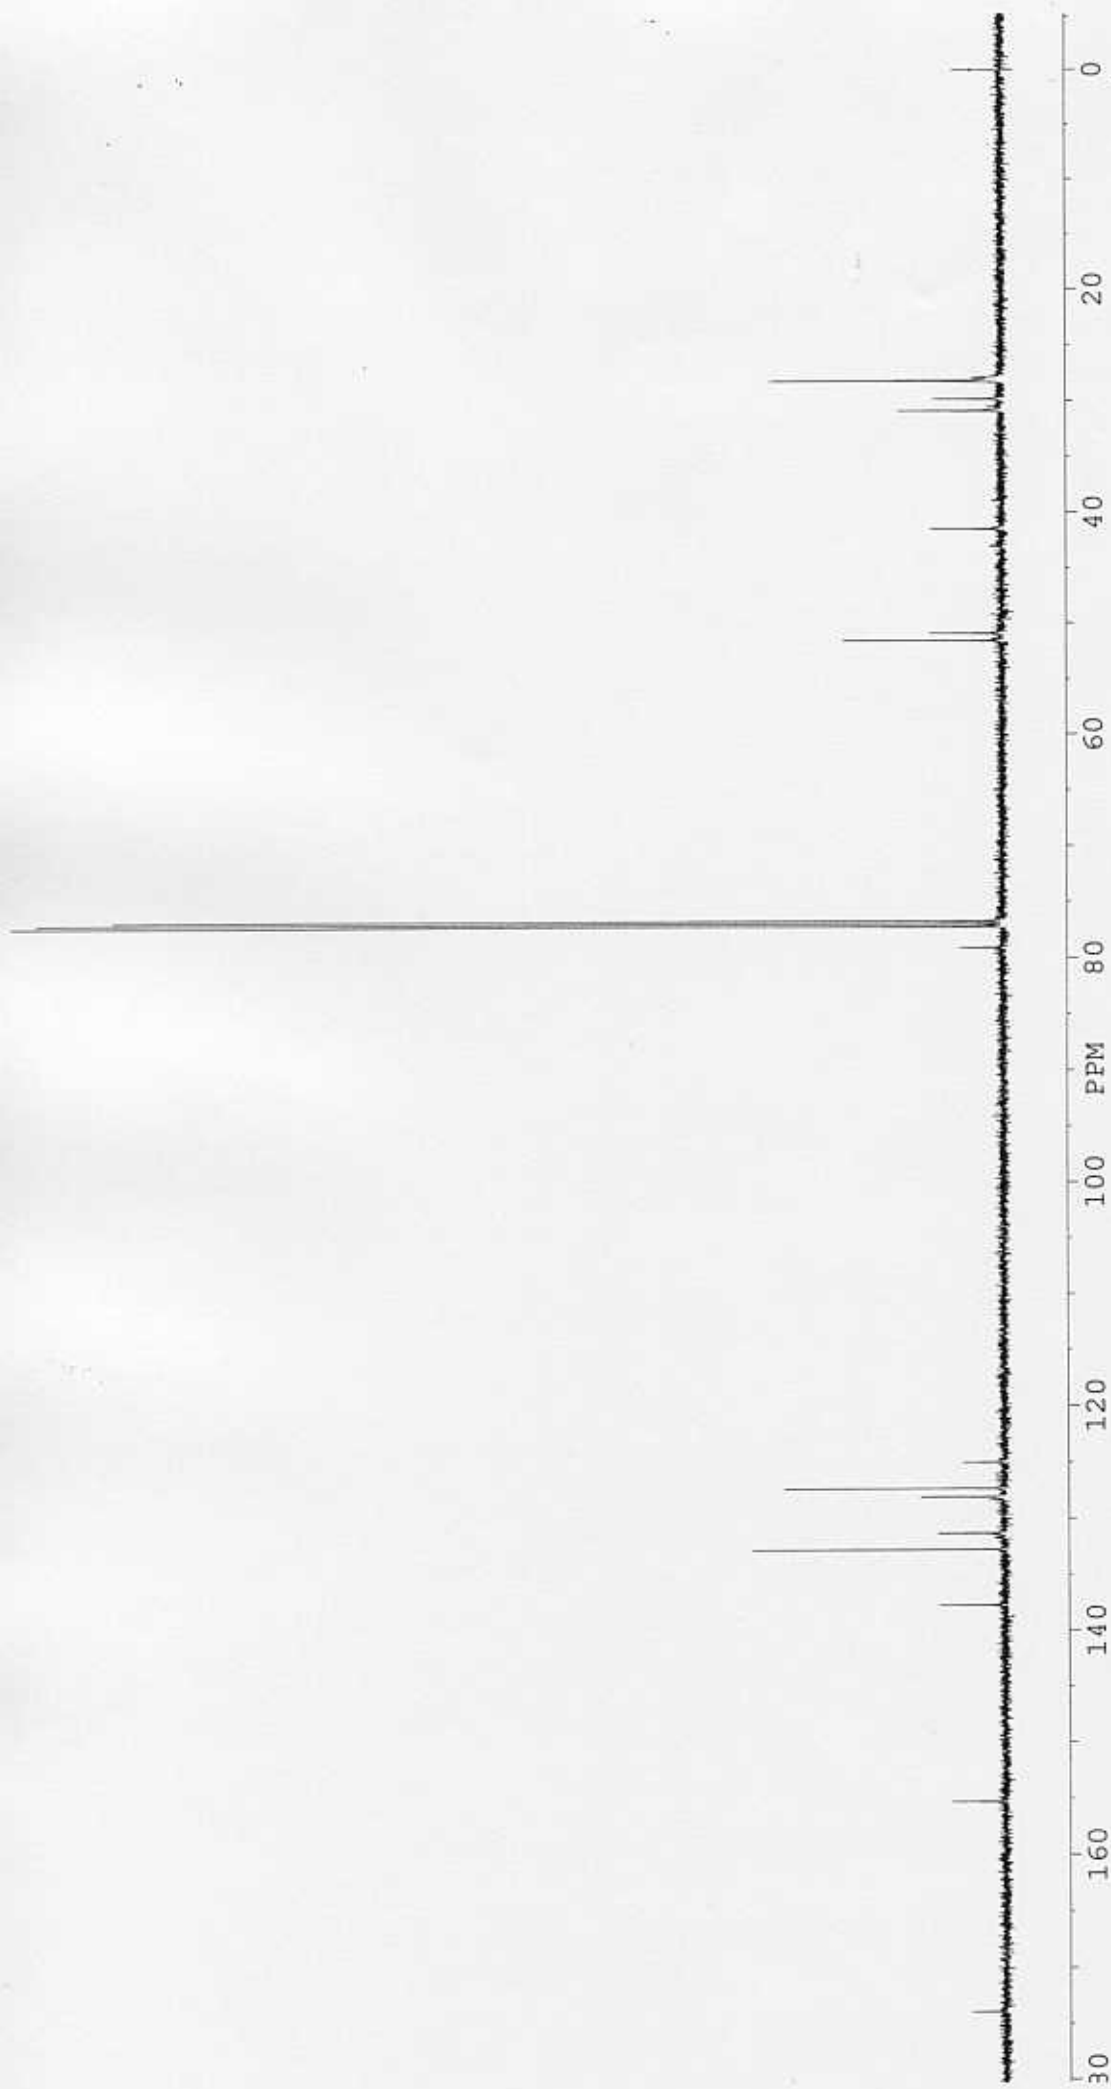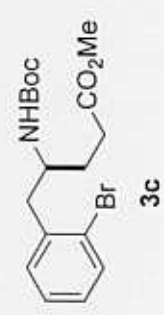

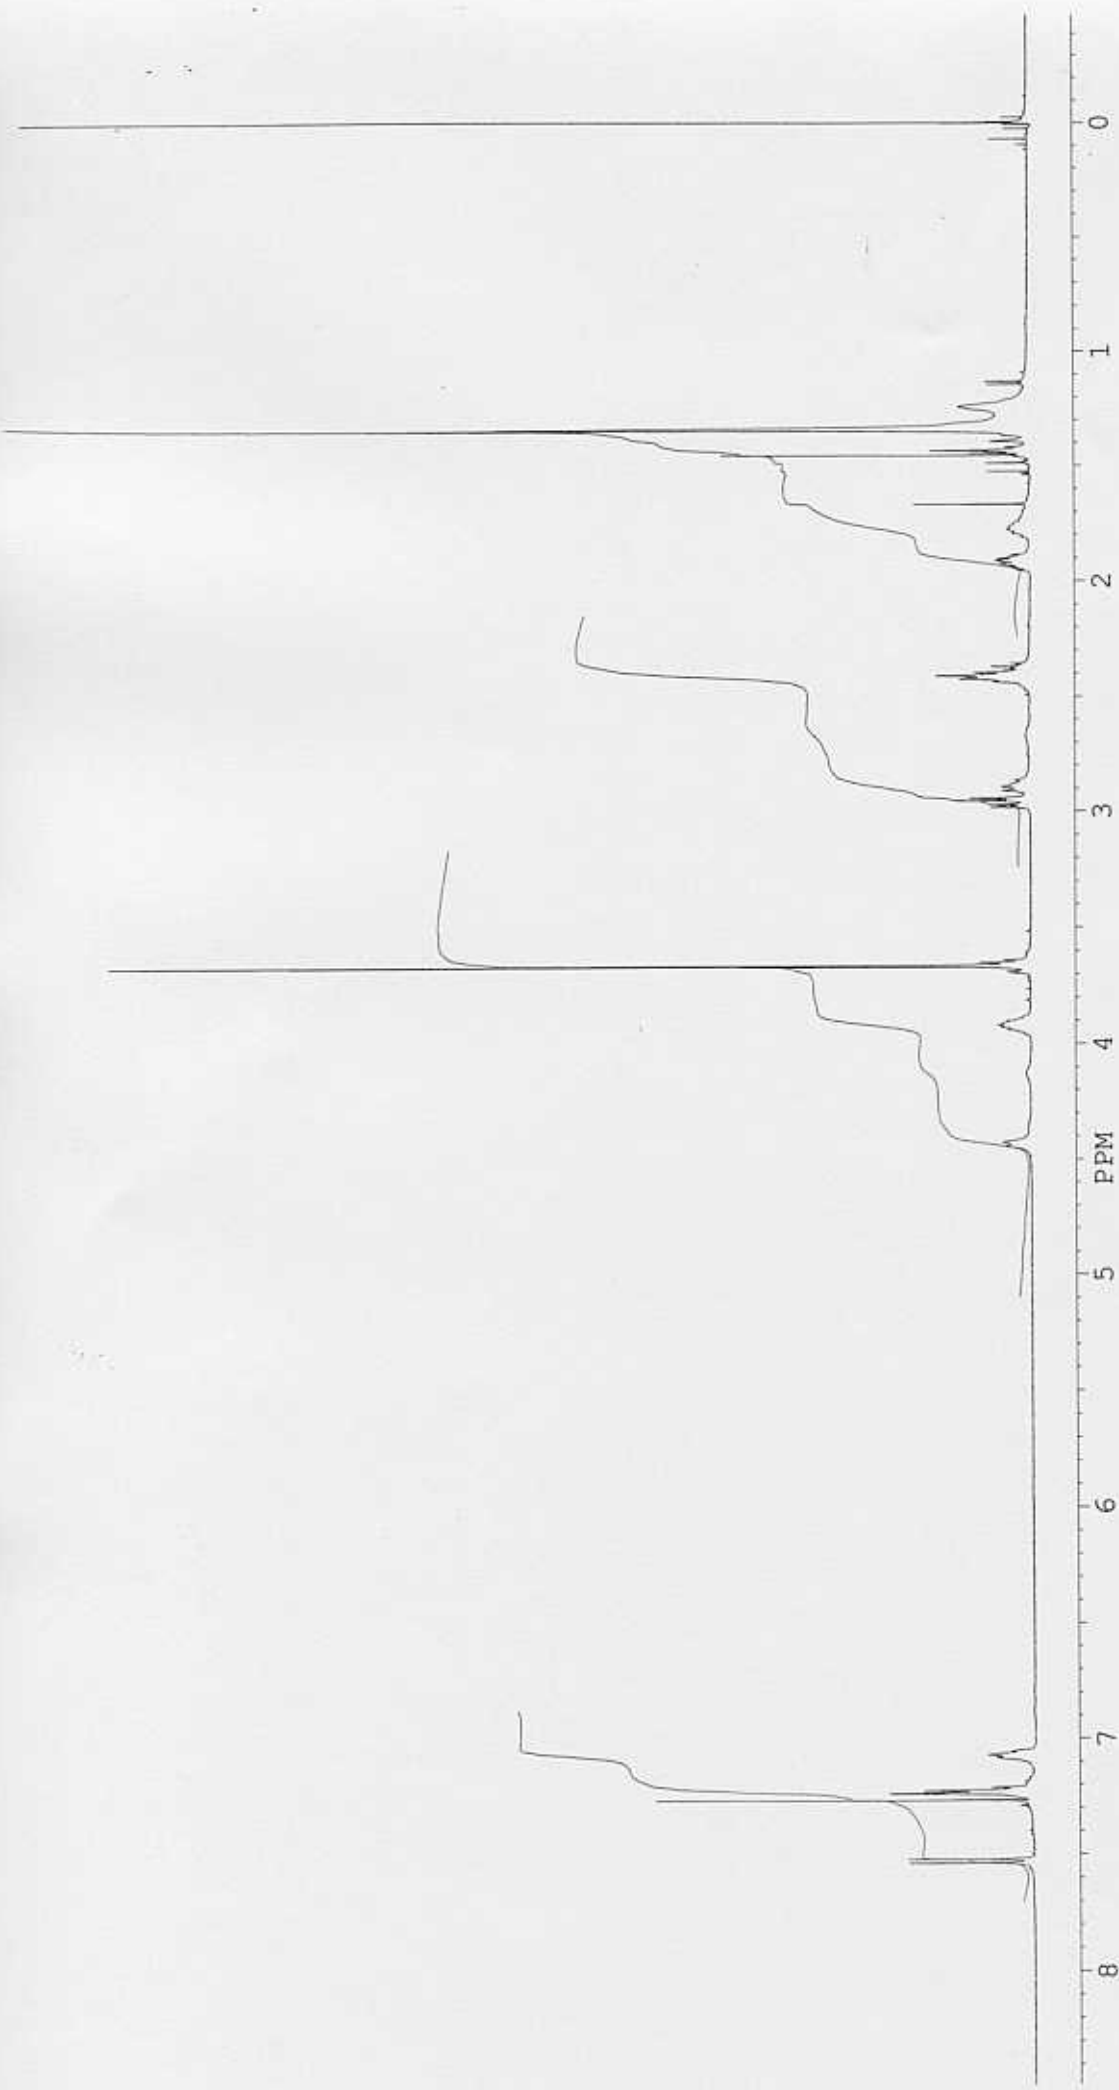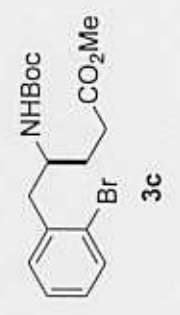

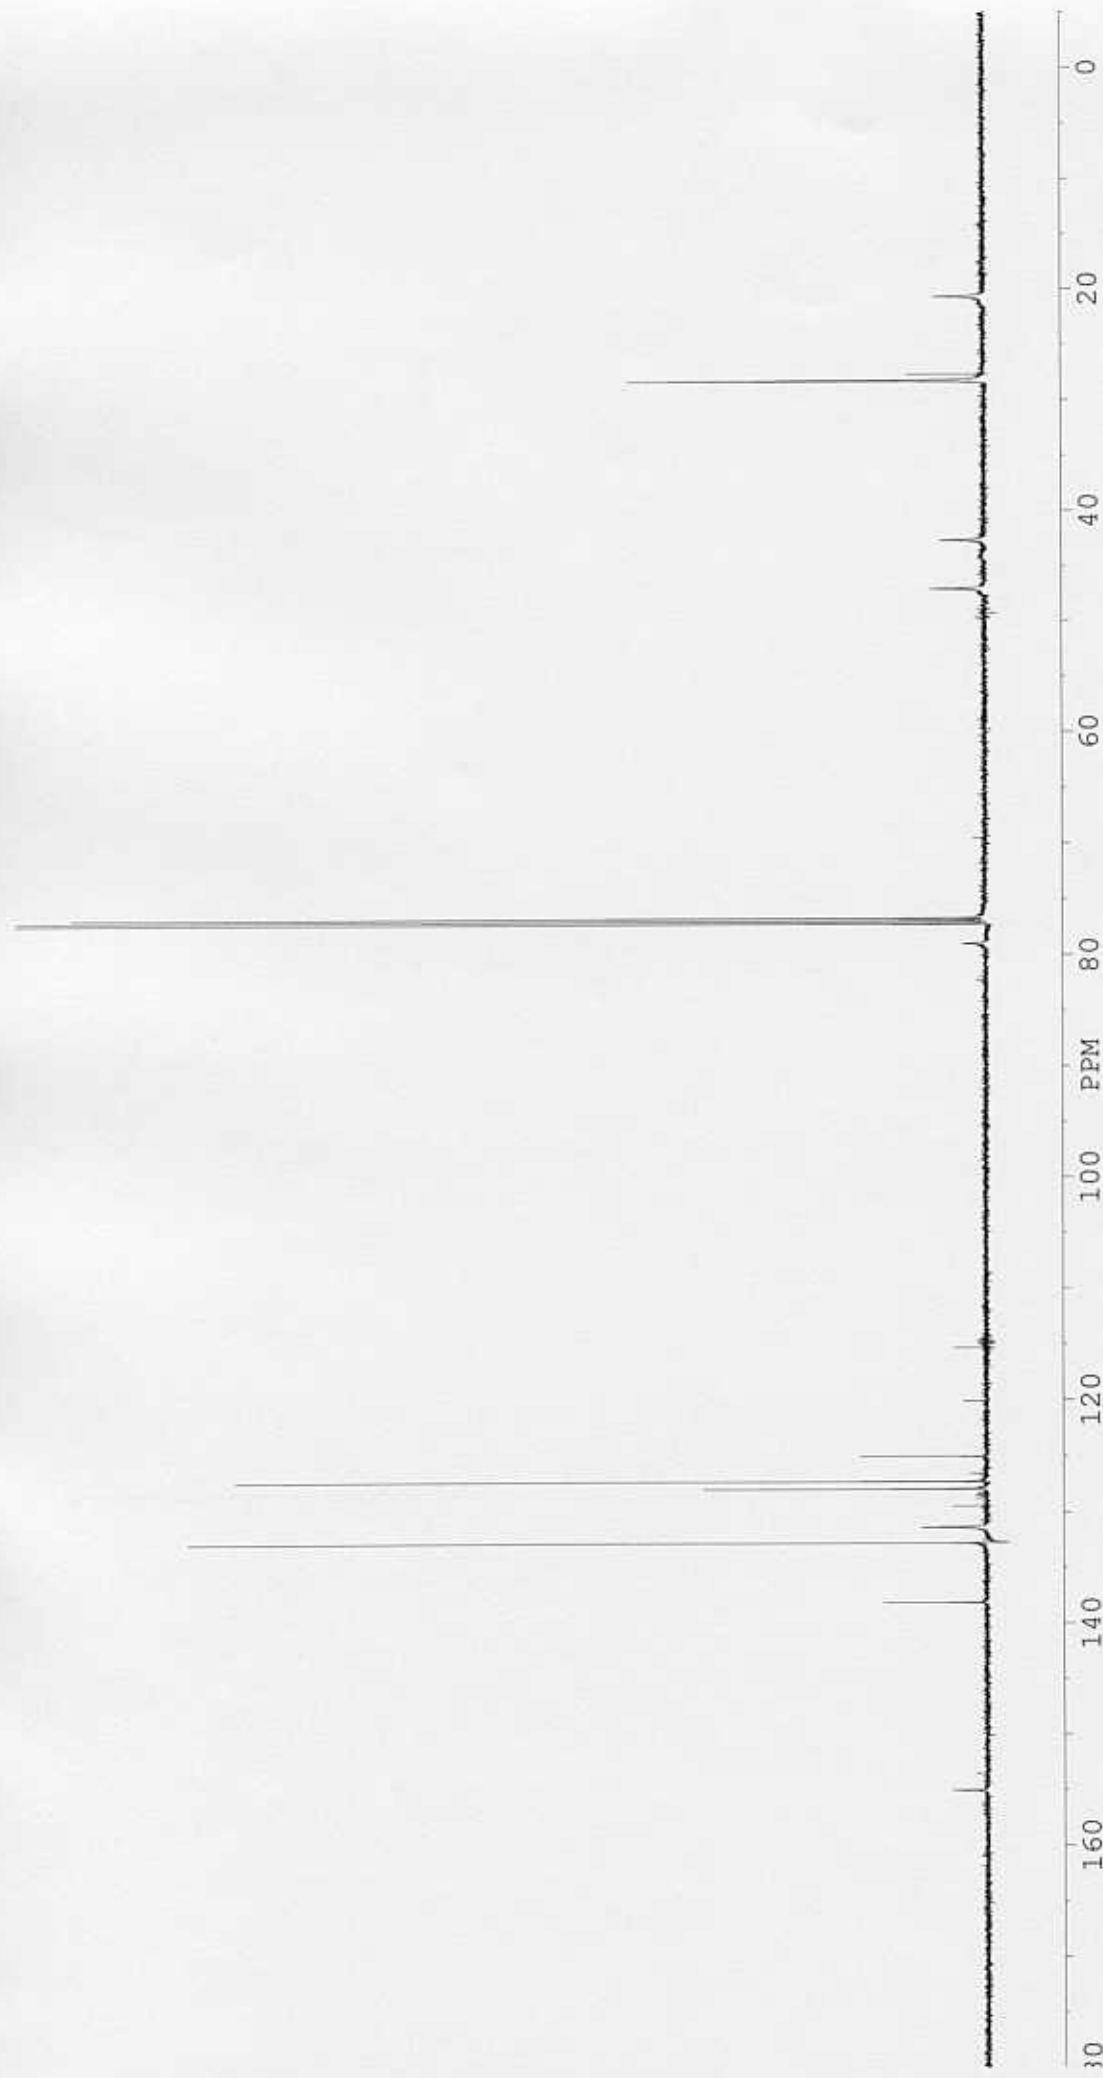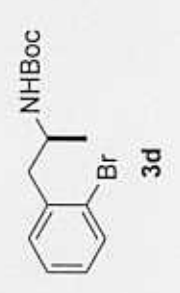

30 160 140 120 100 80 60 40 20 0

PPM

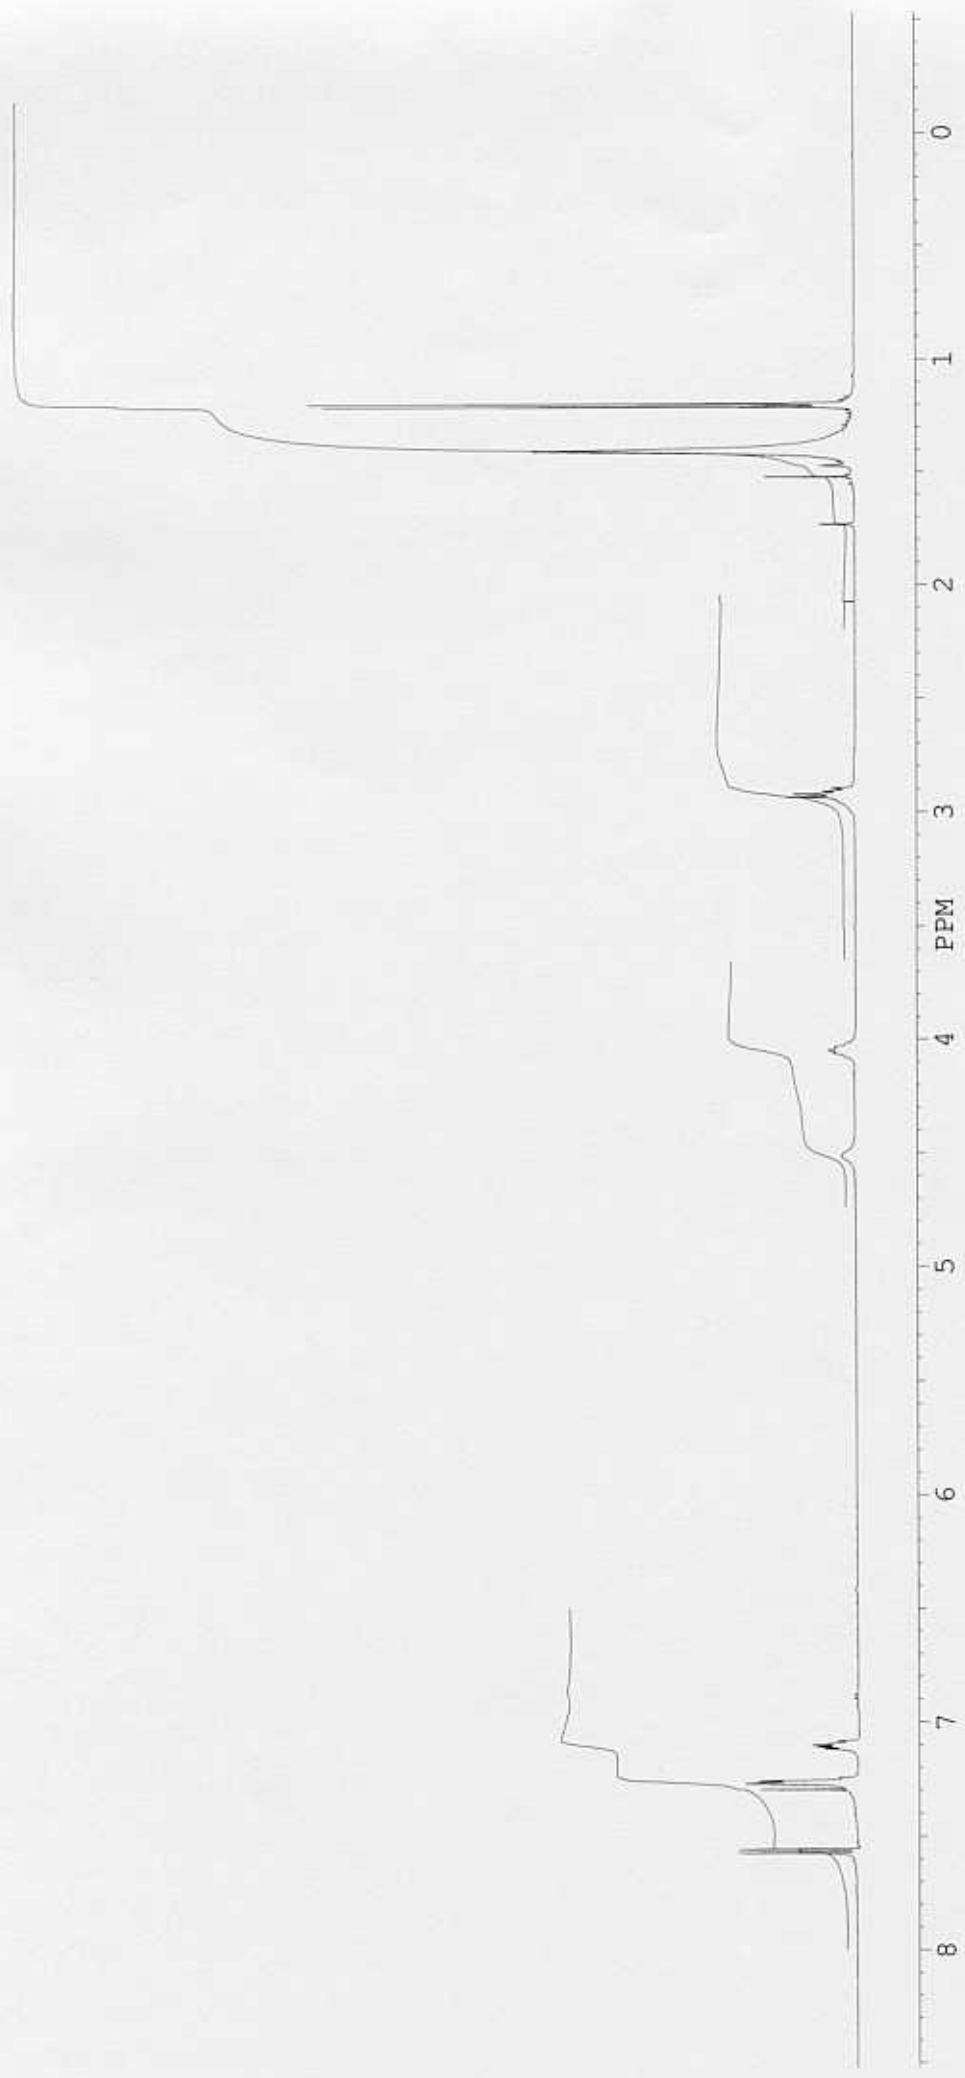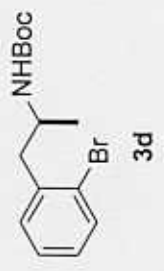

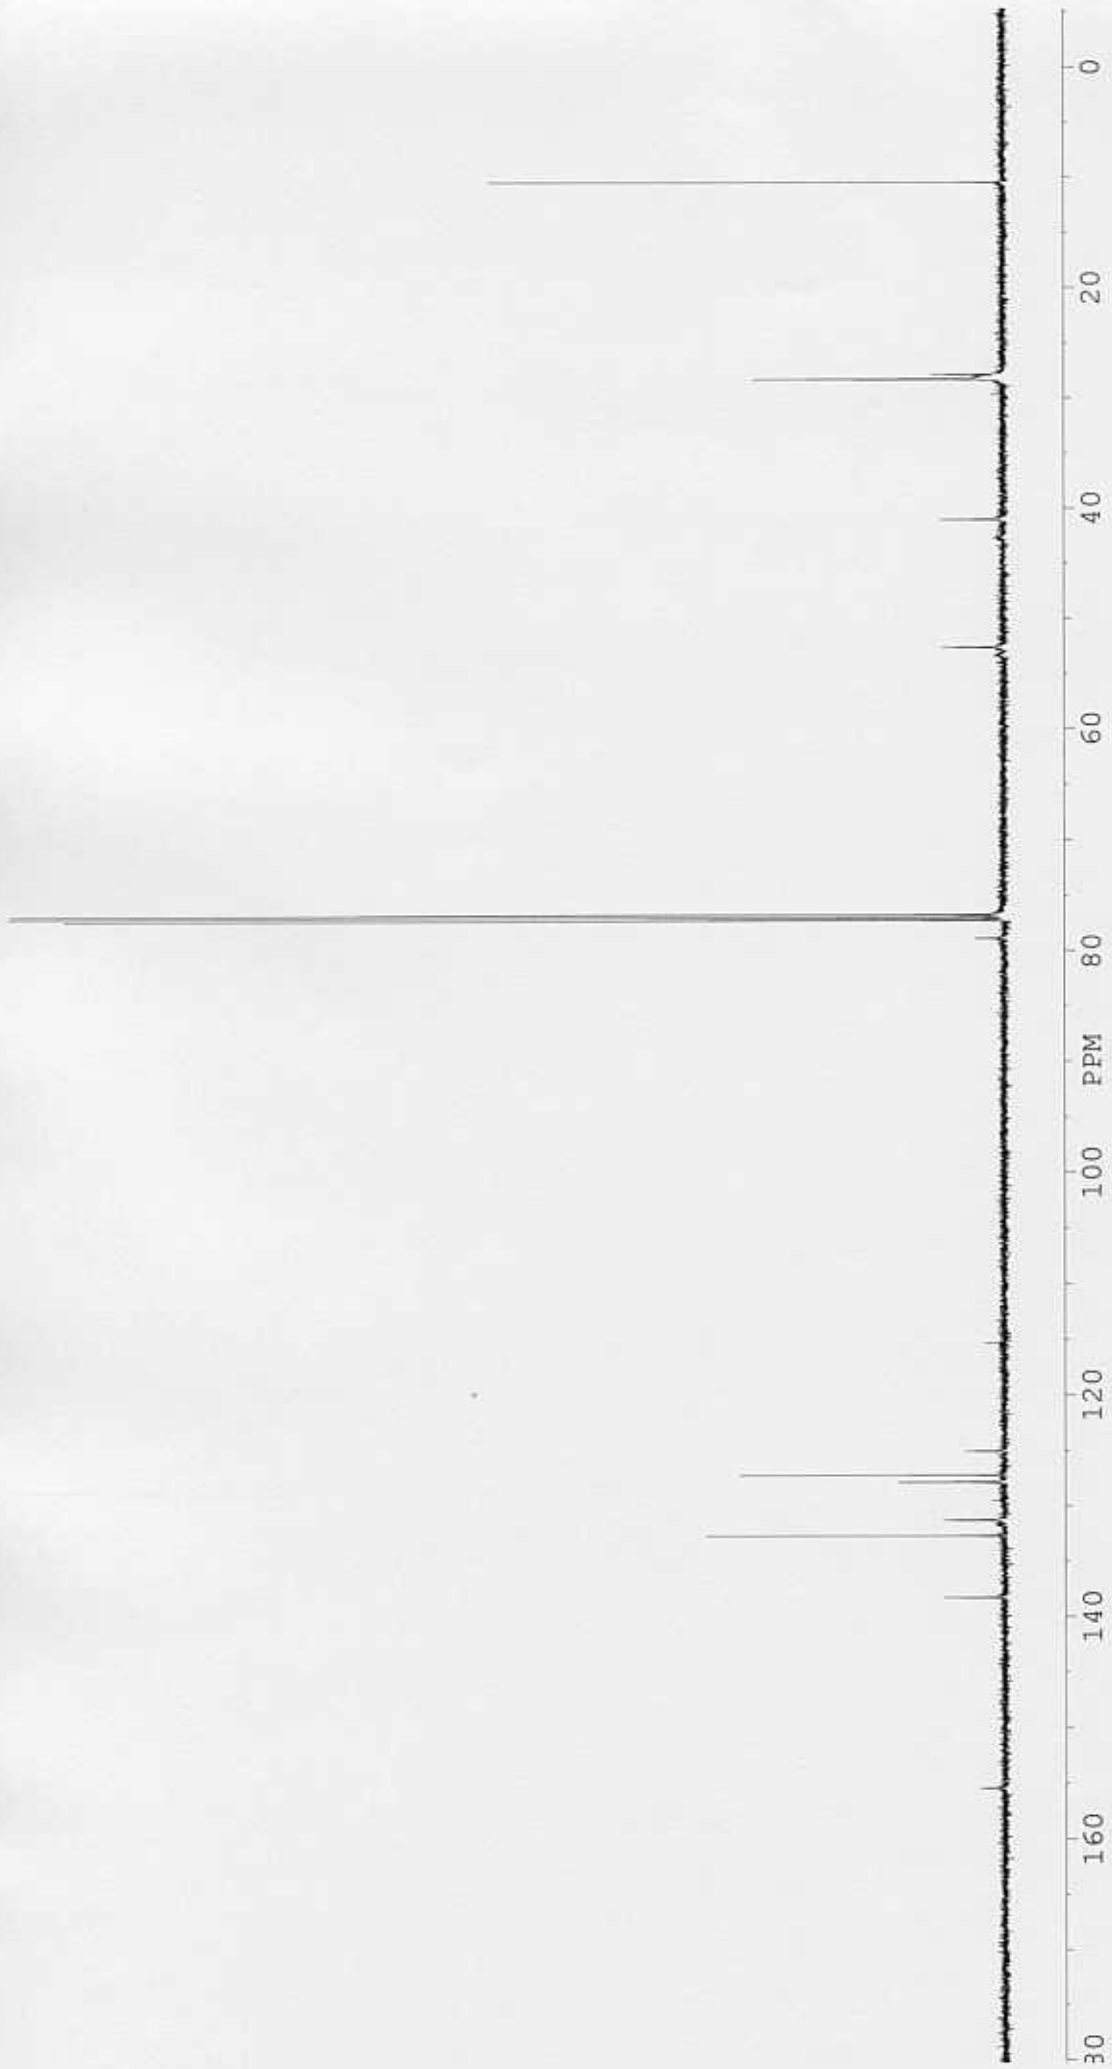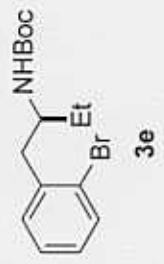

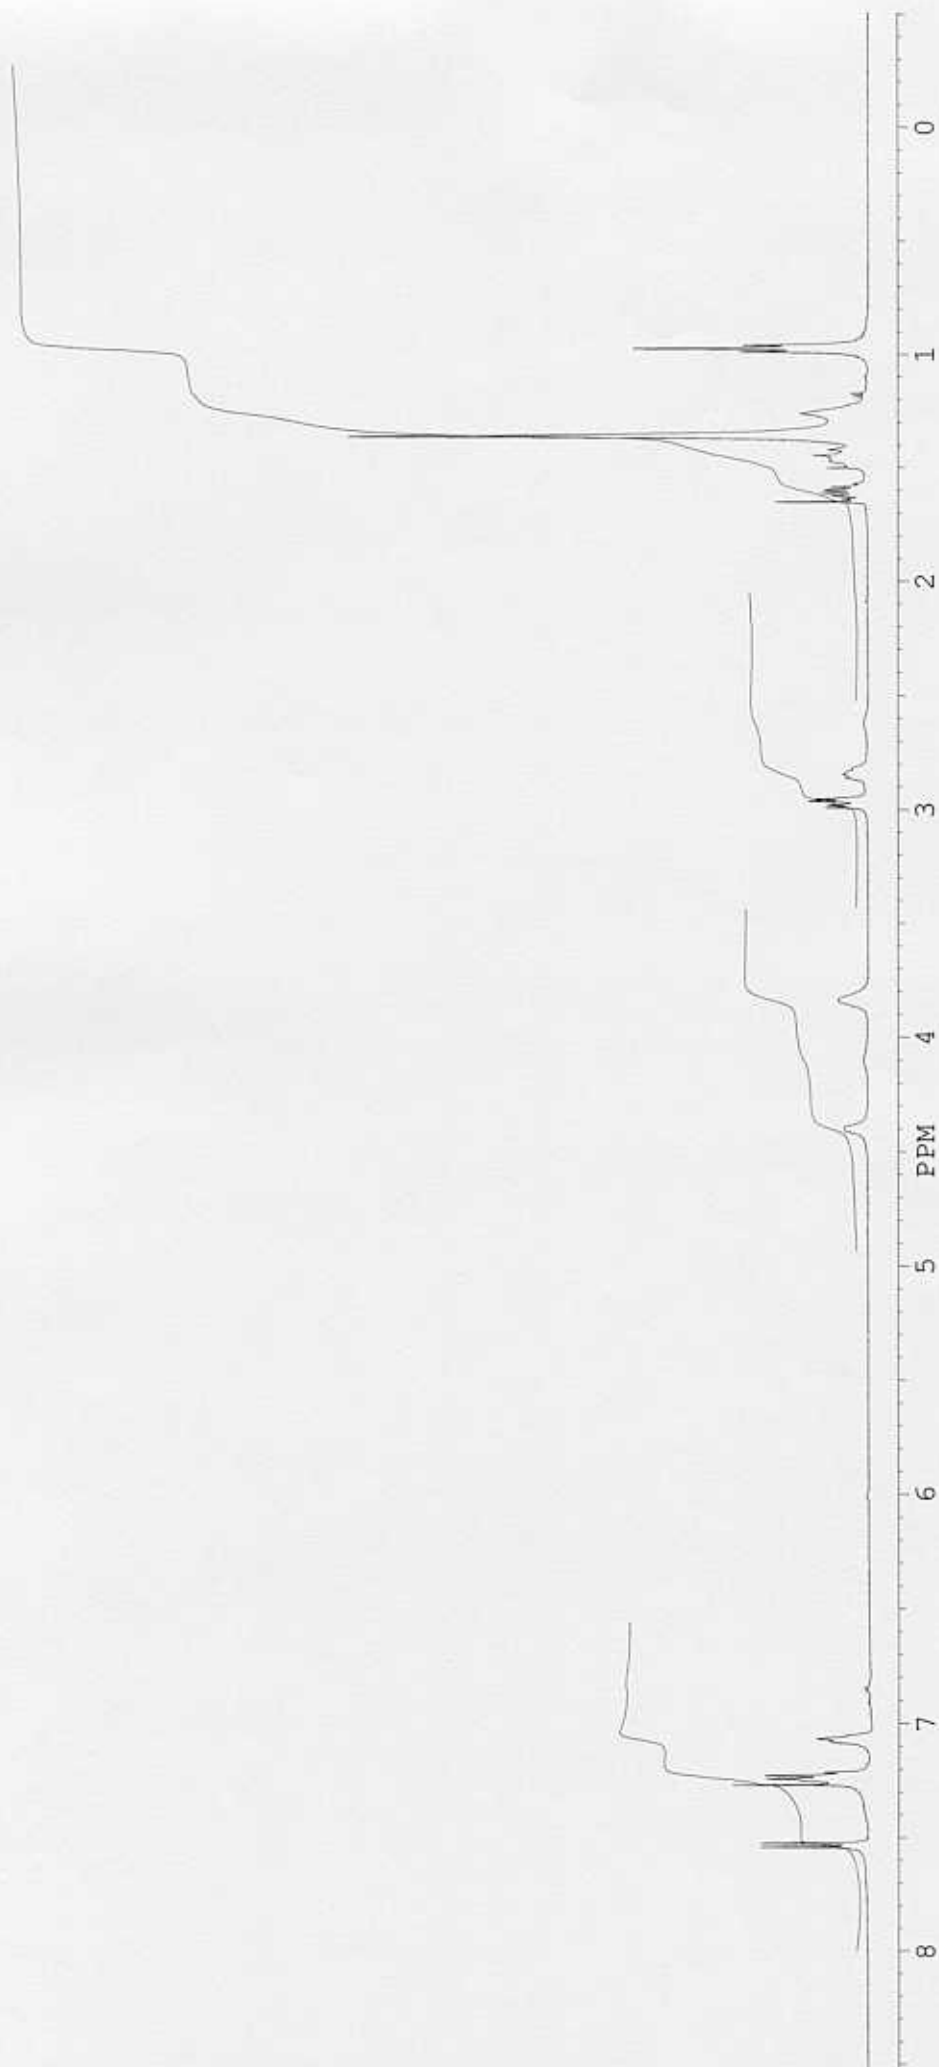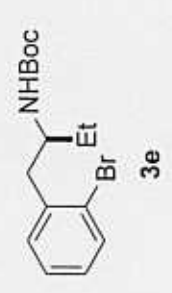

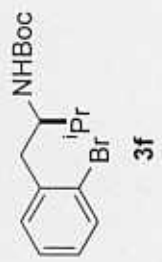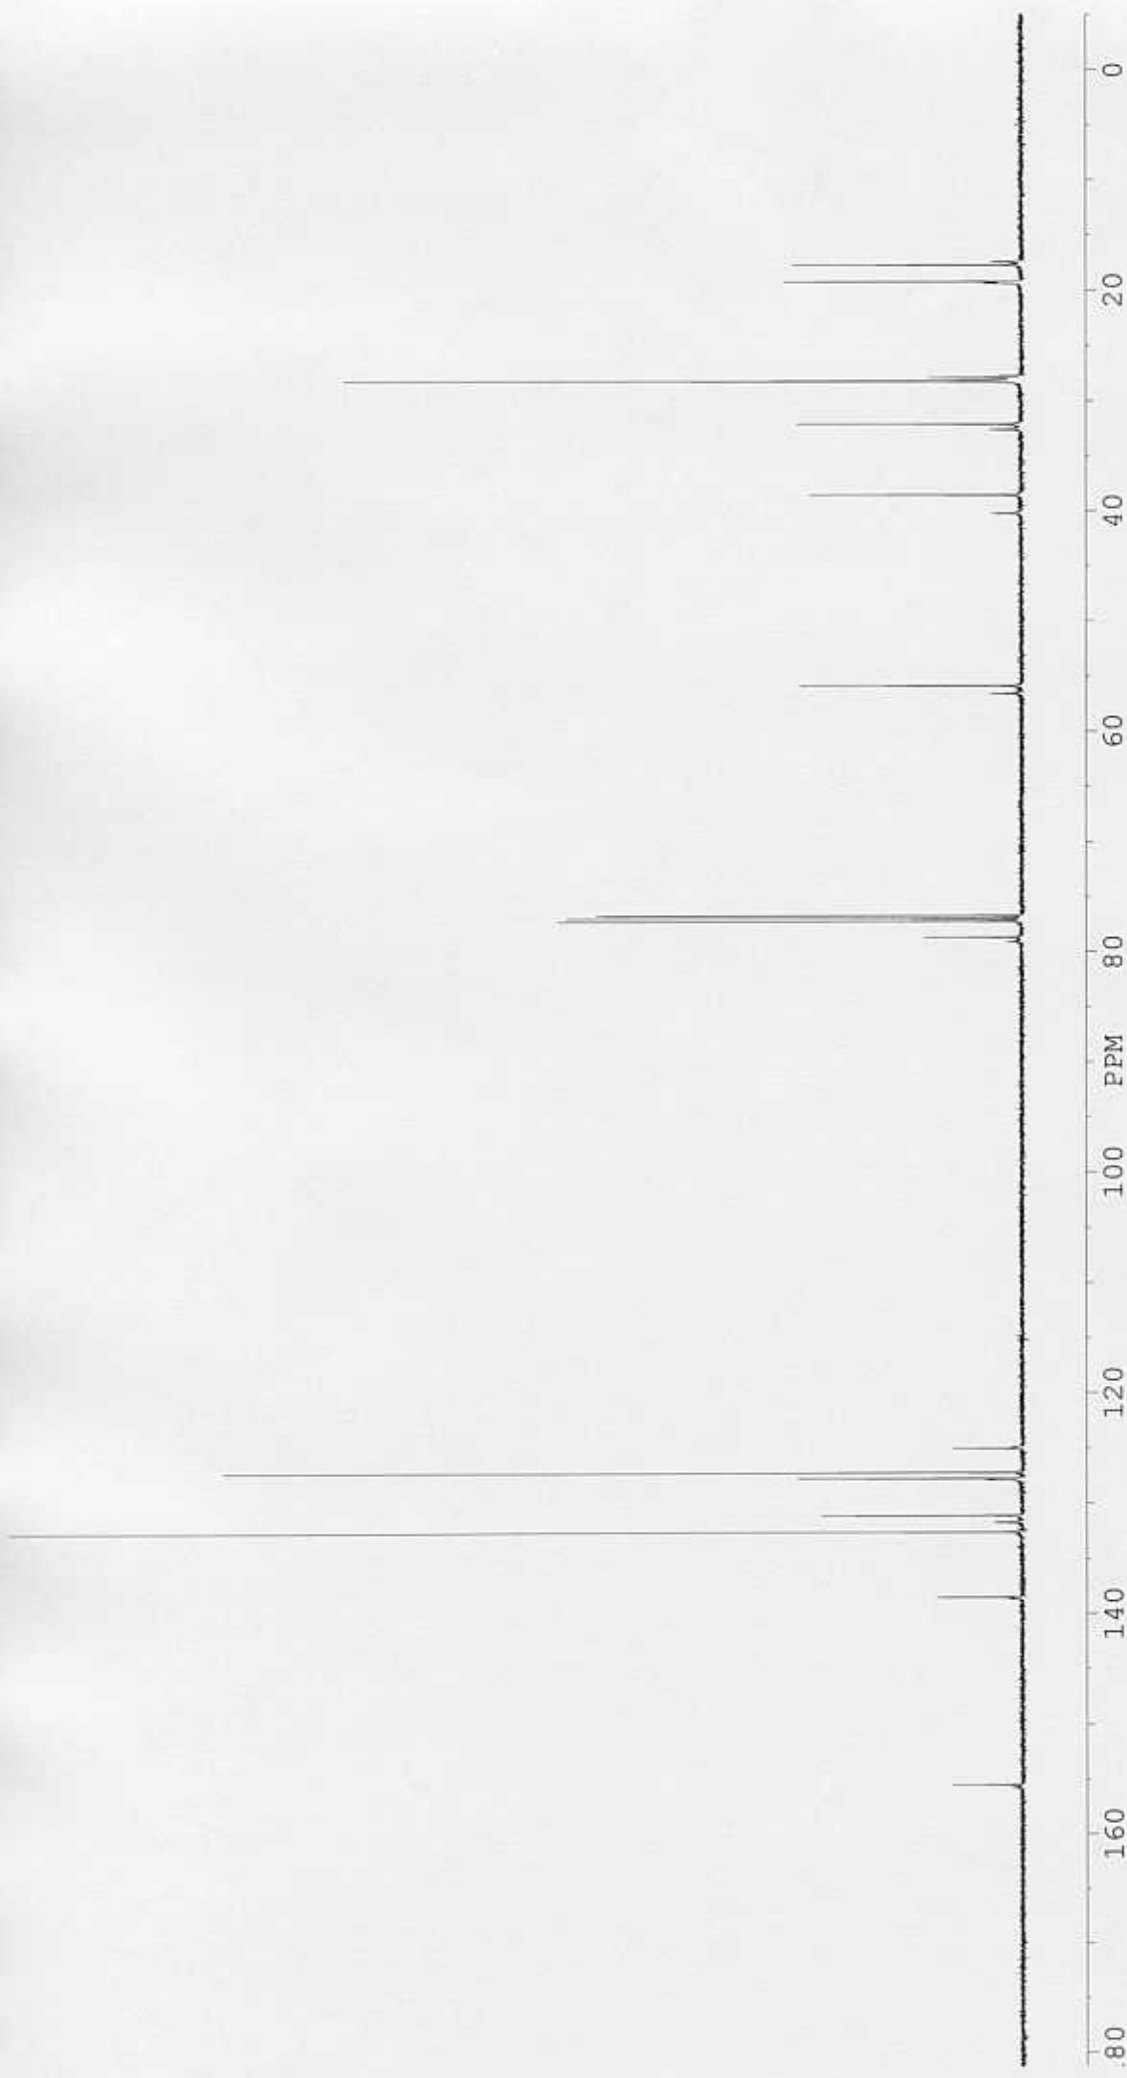

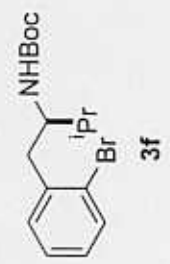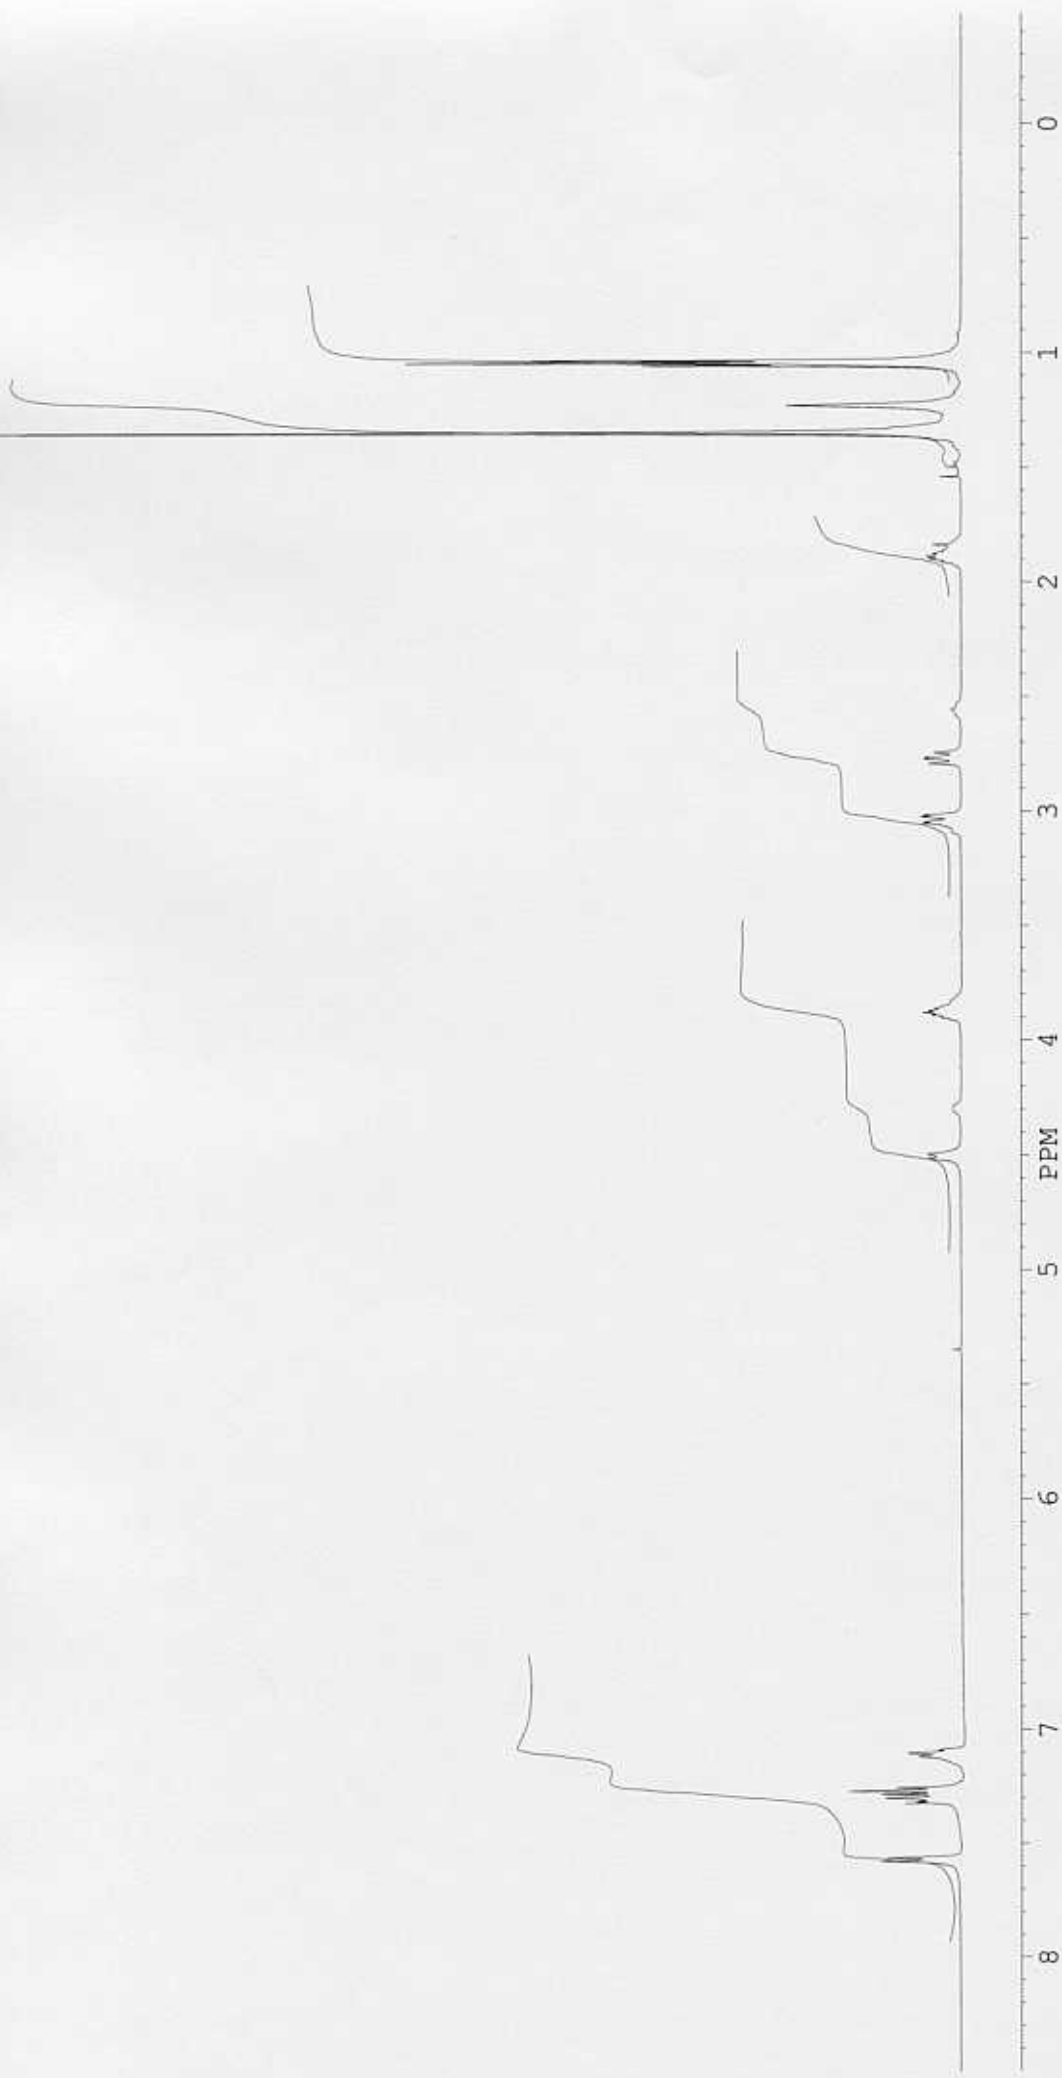



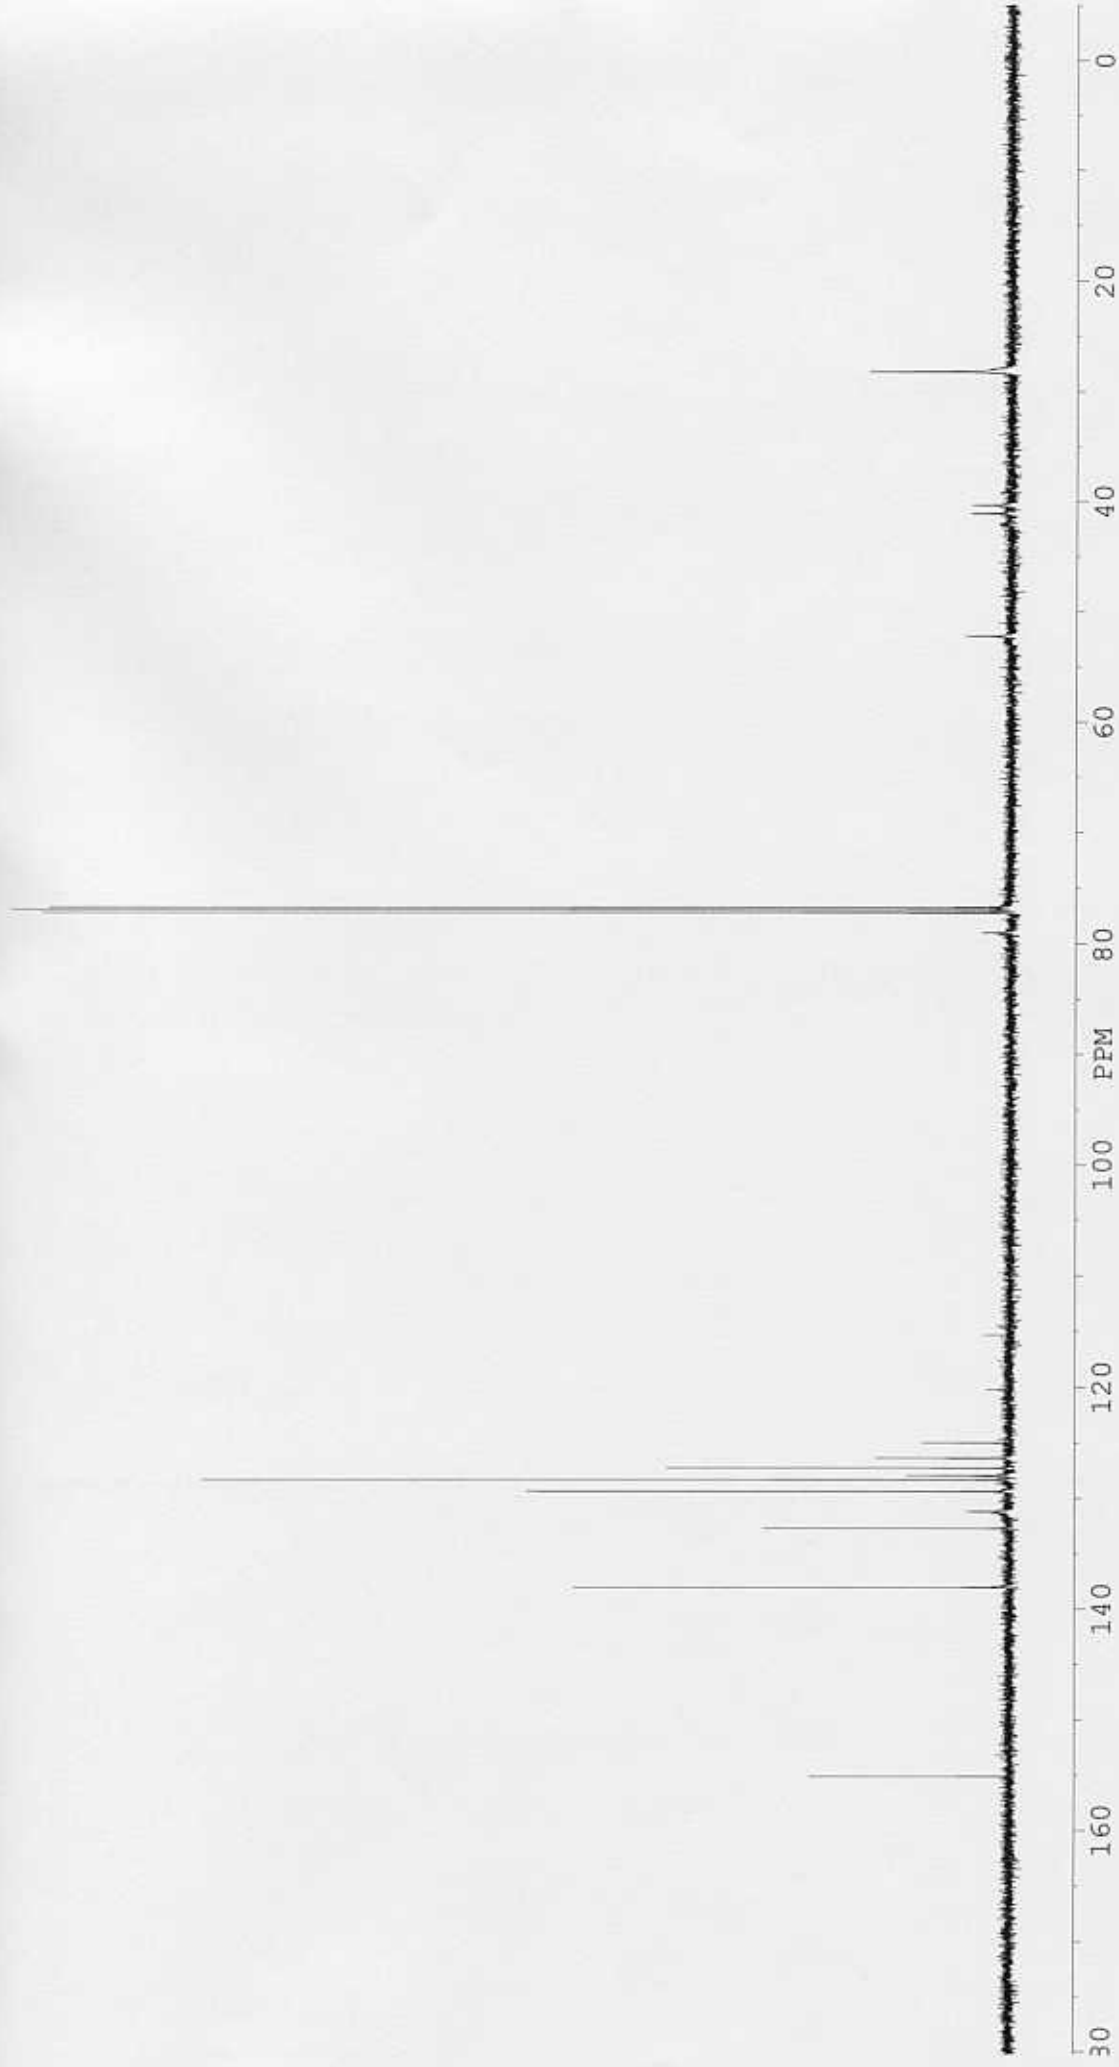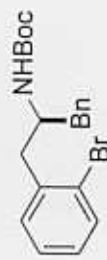

3g

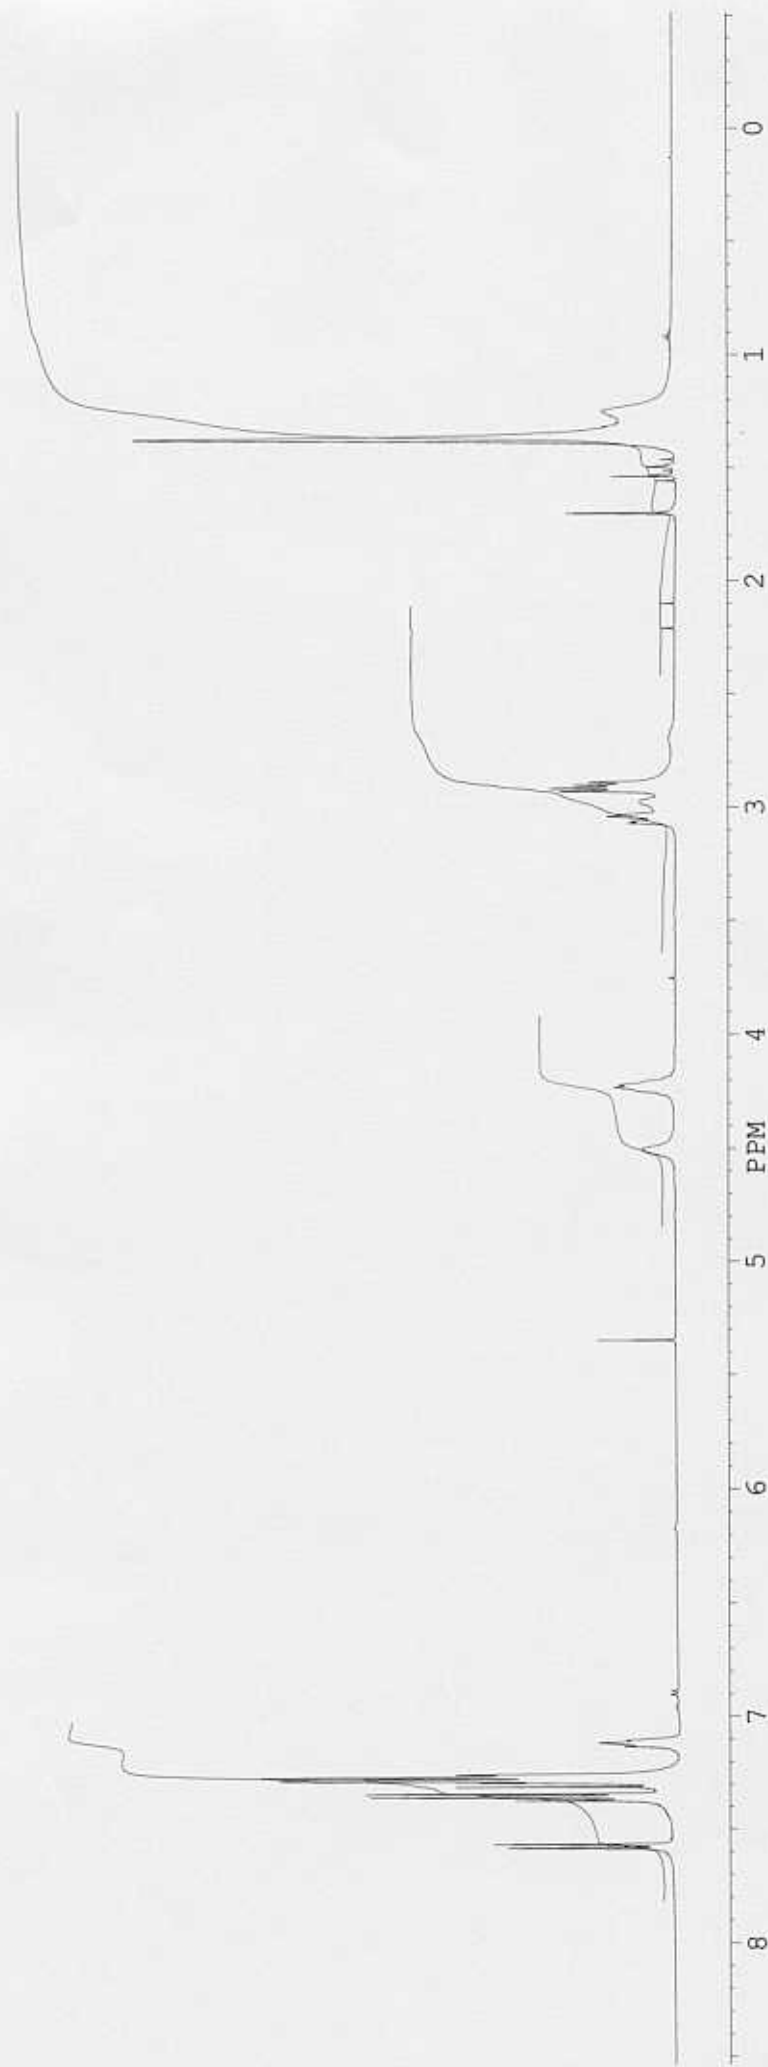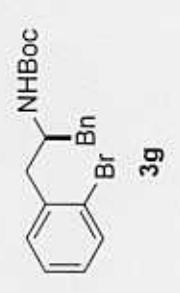

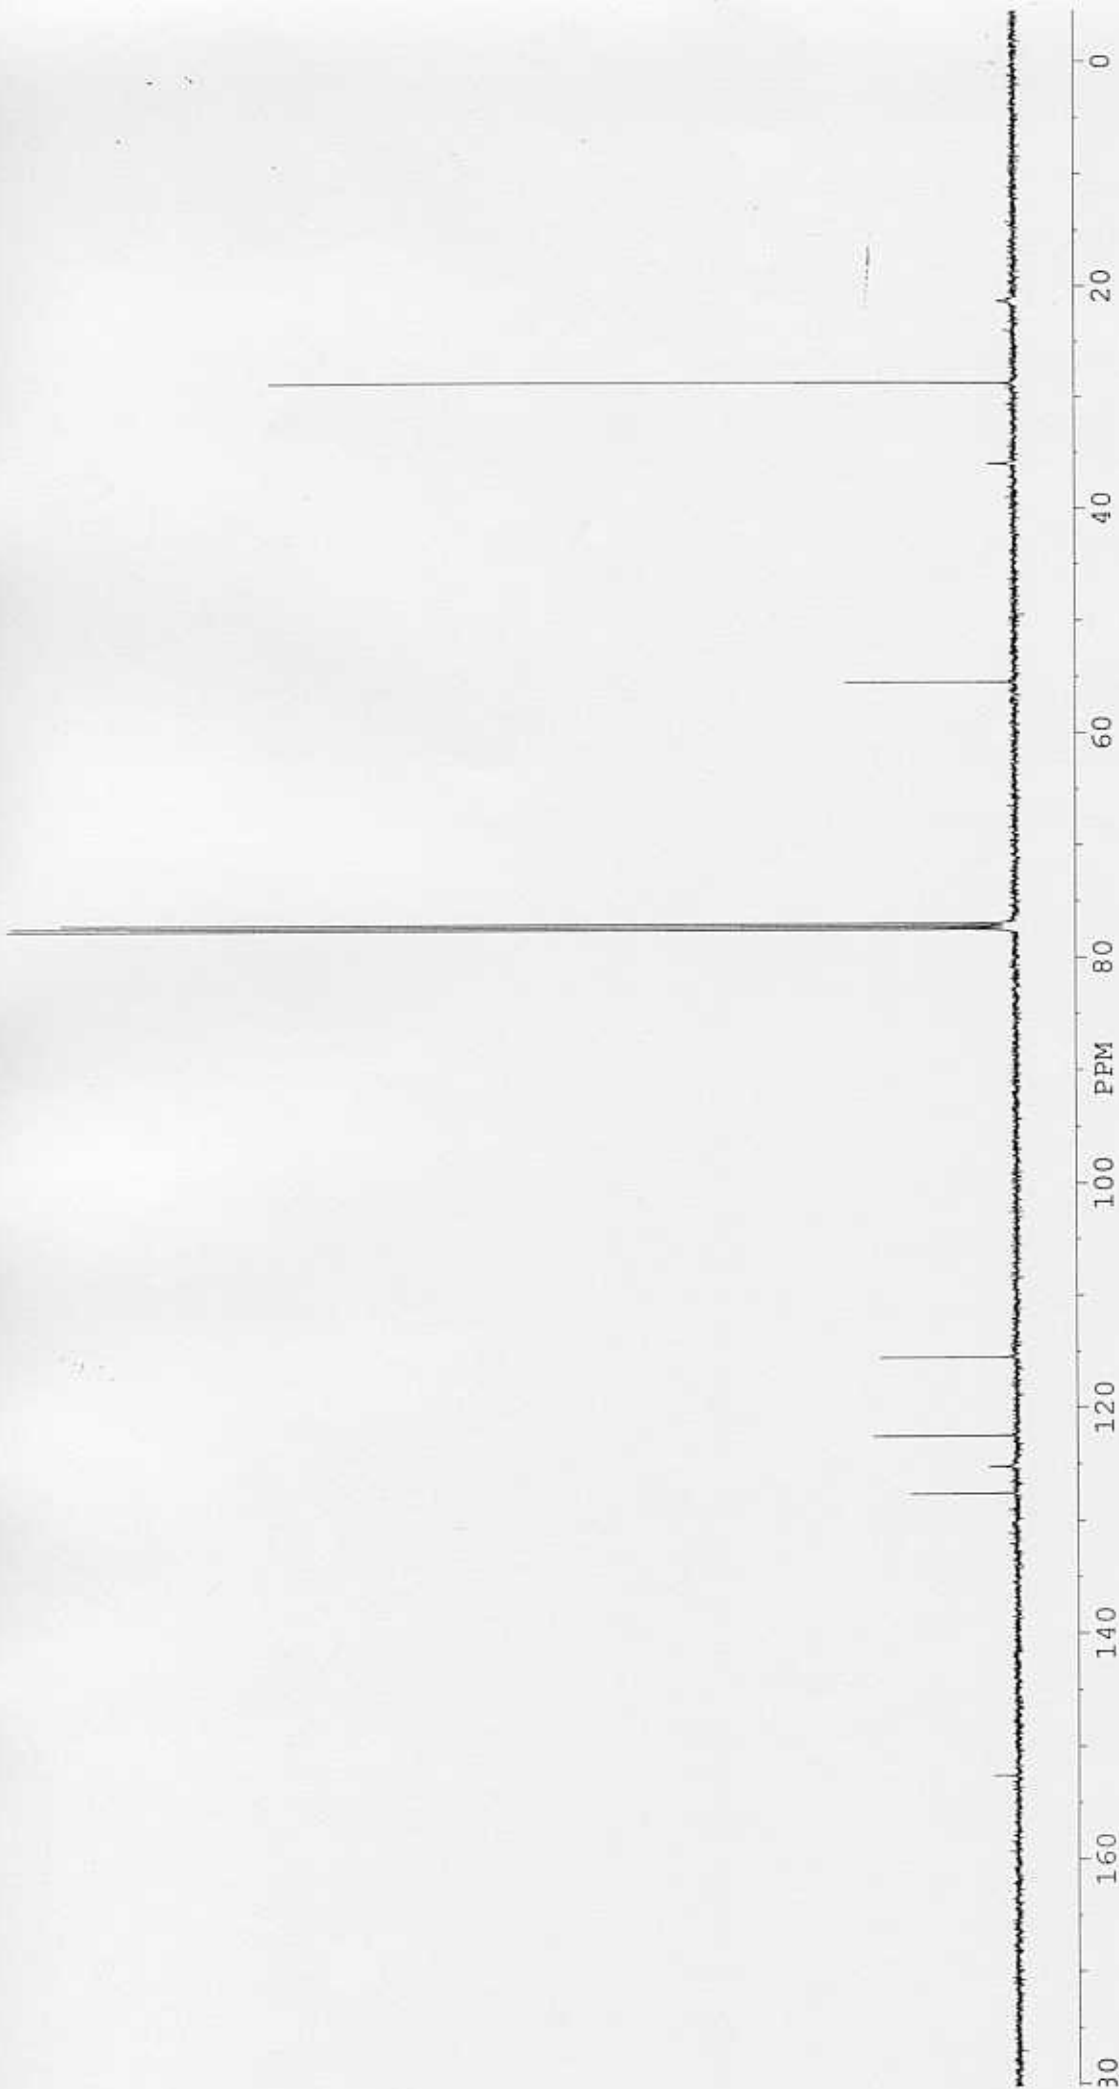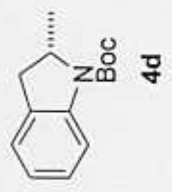

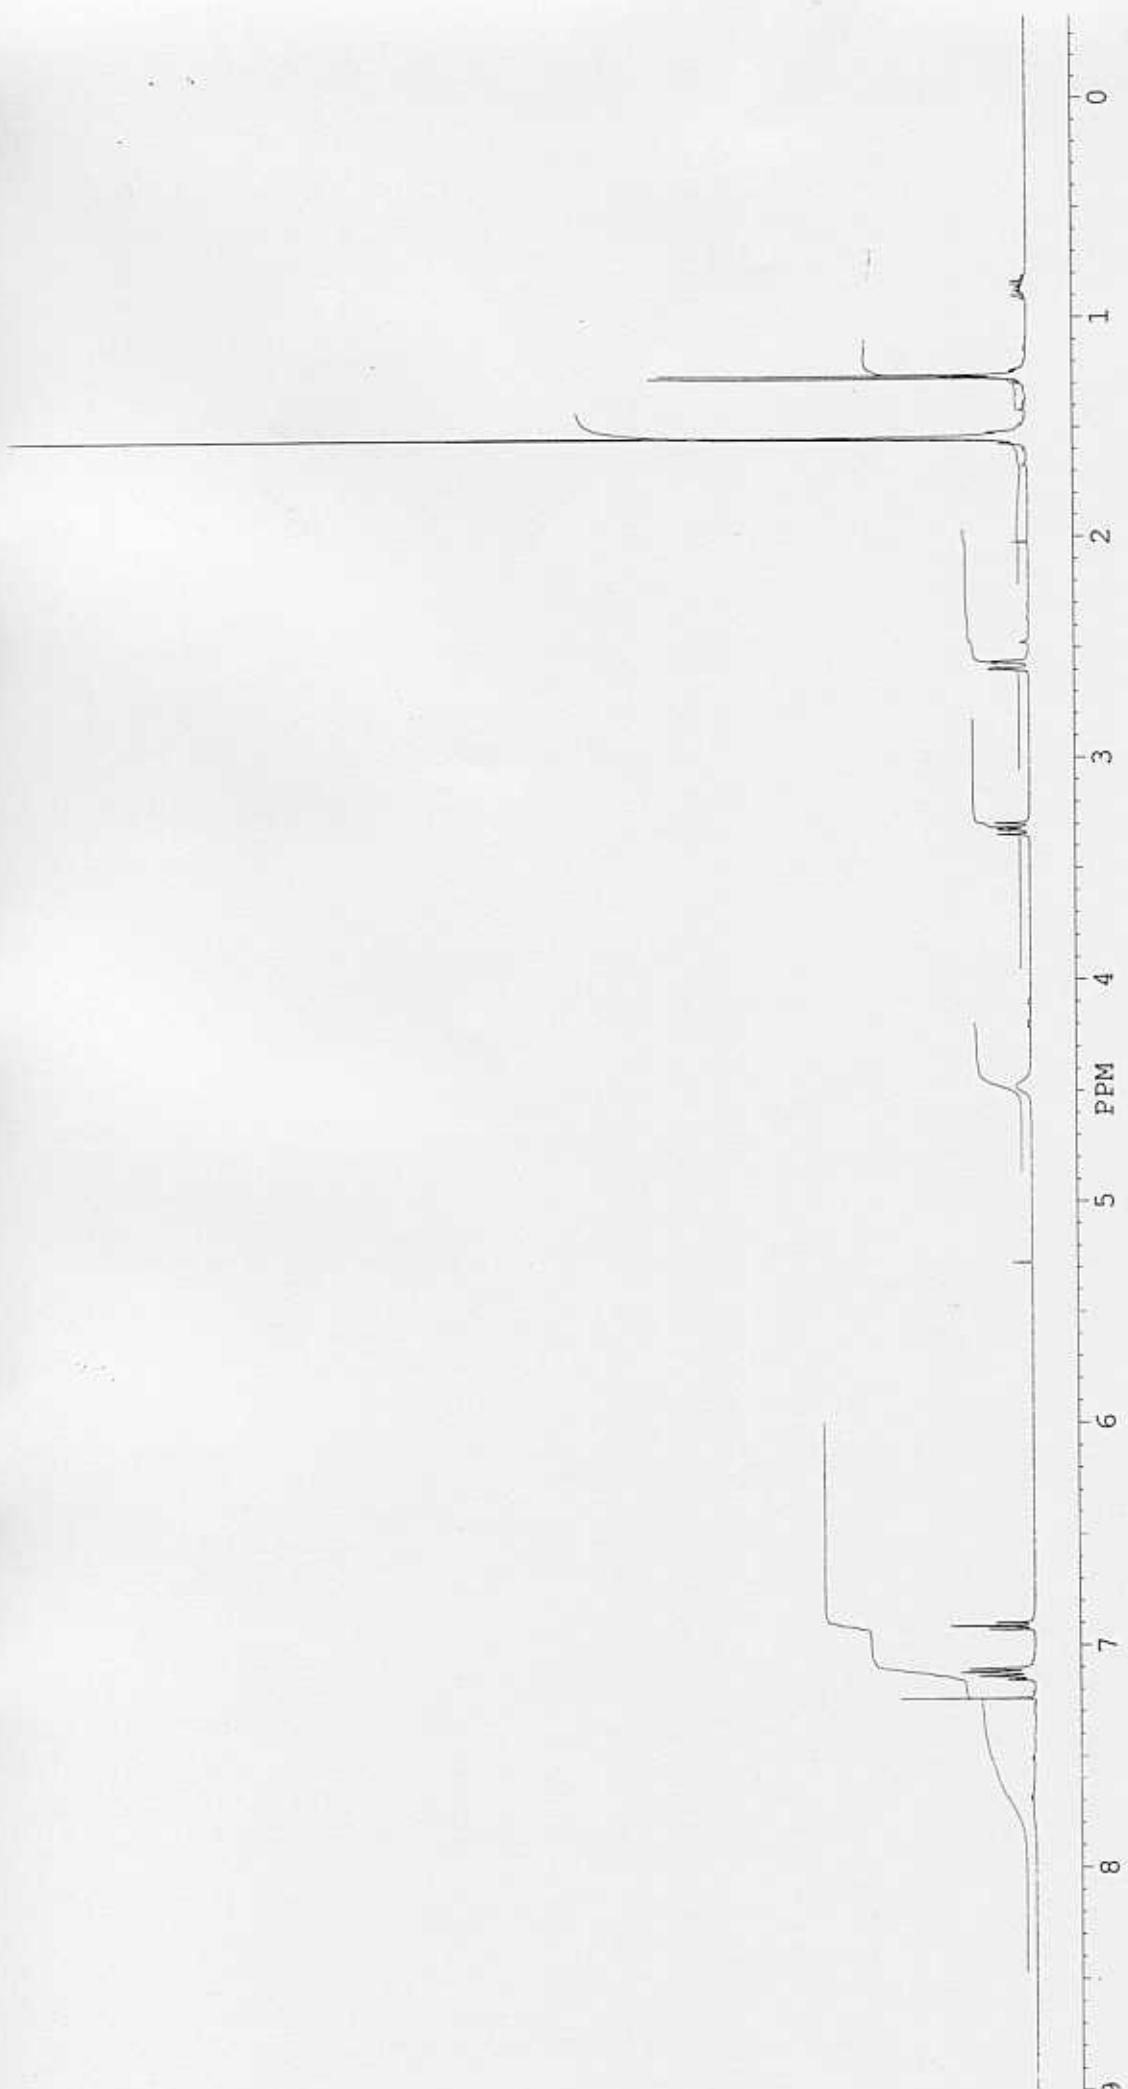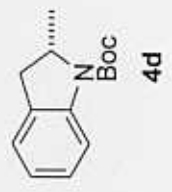

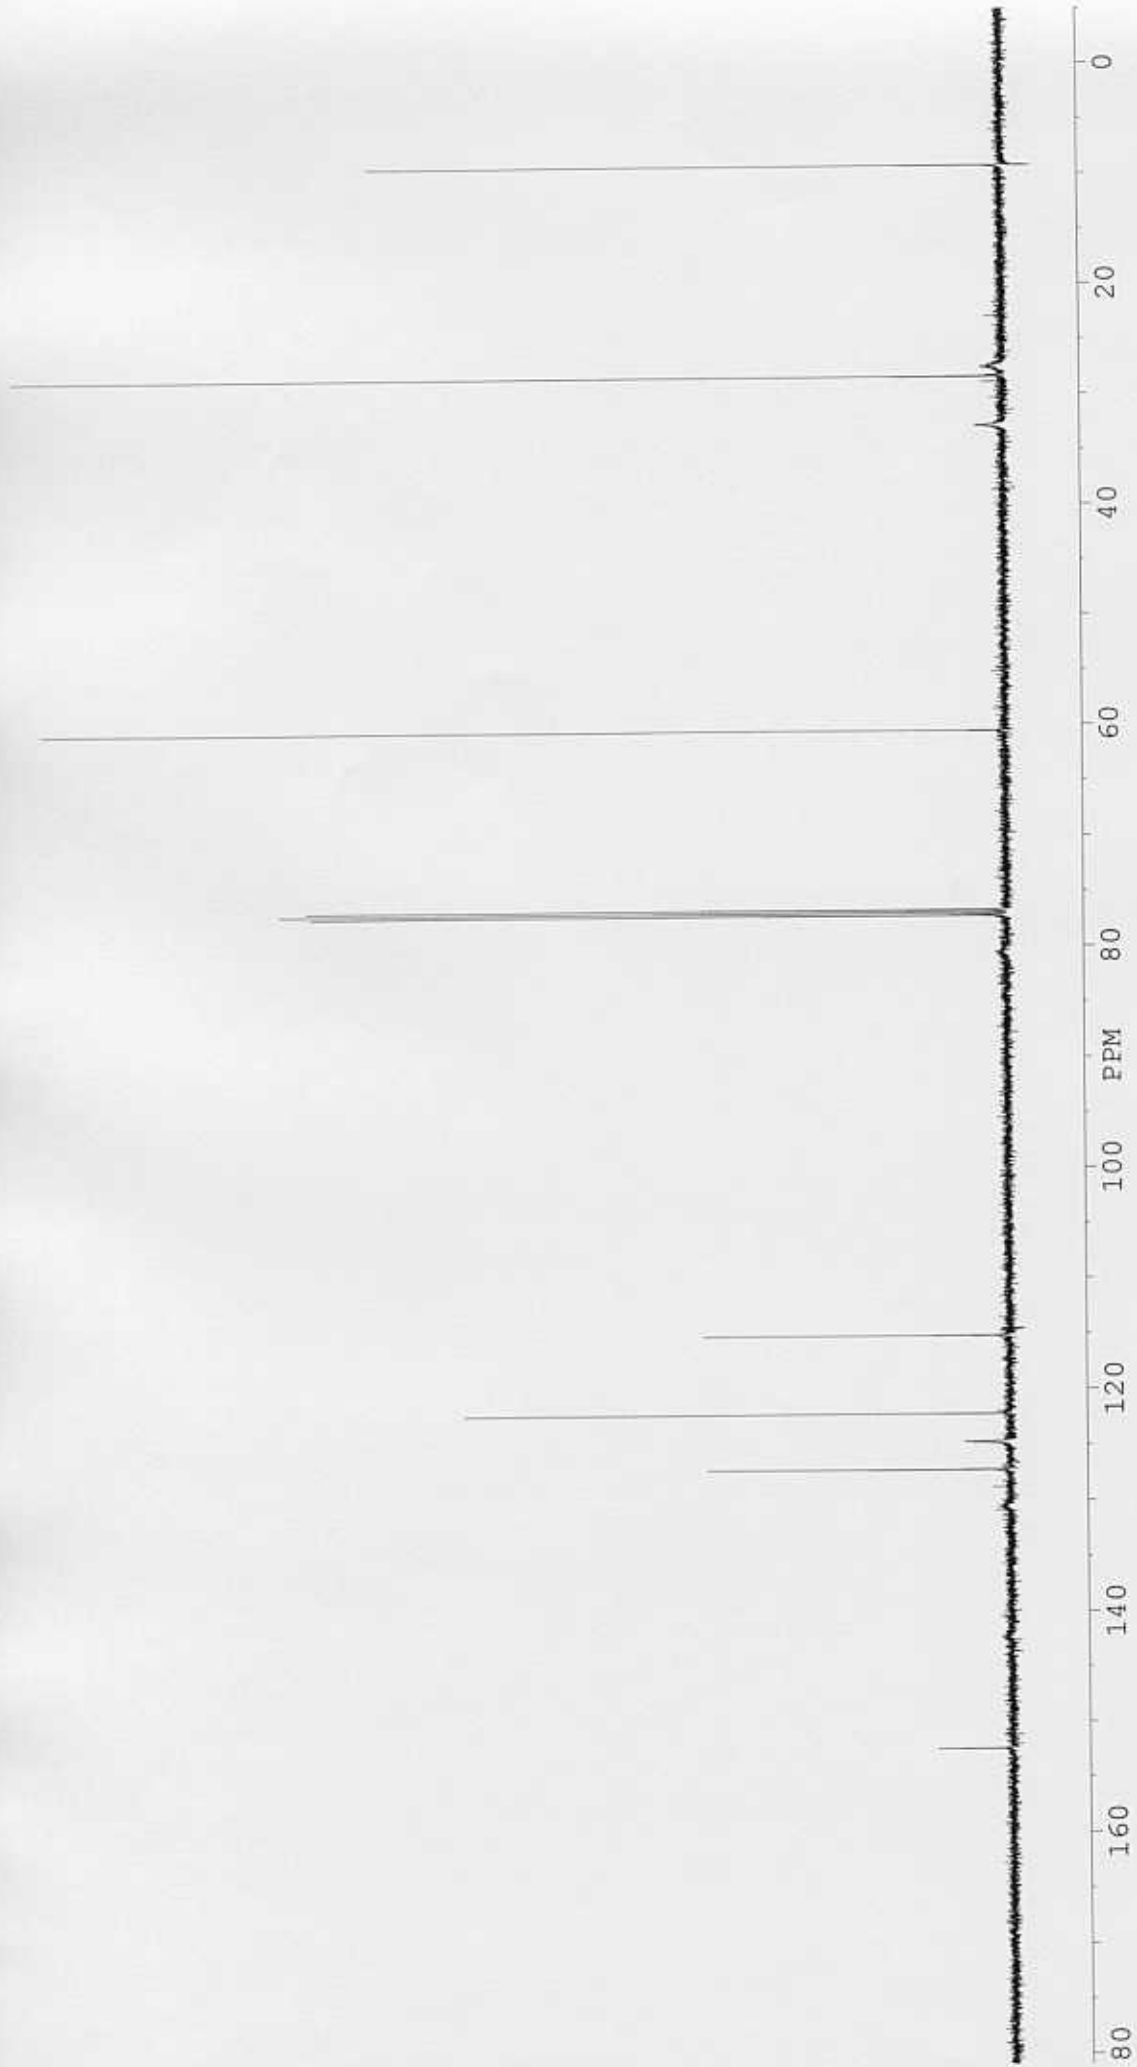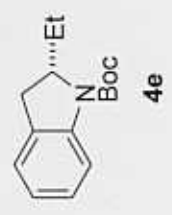

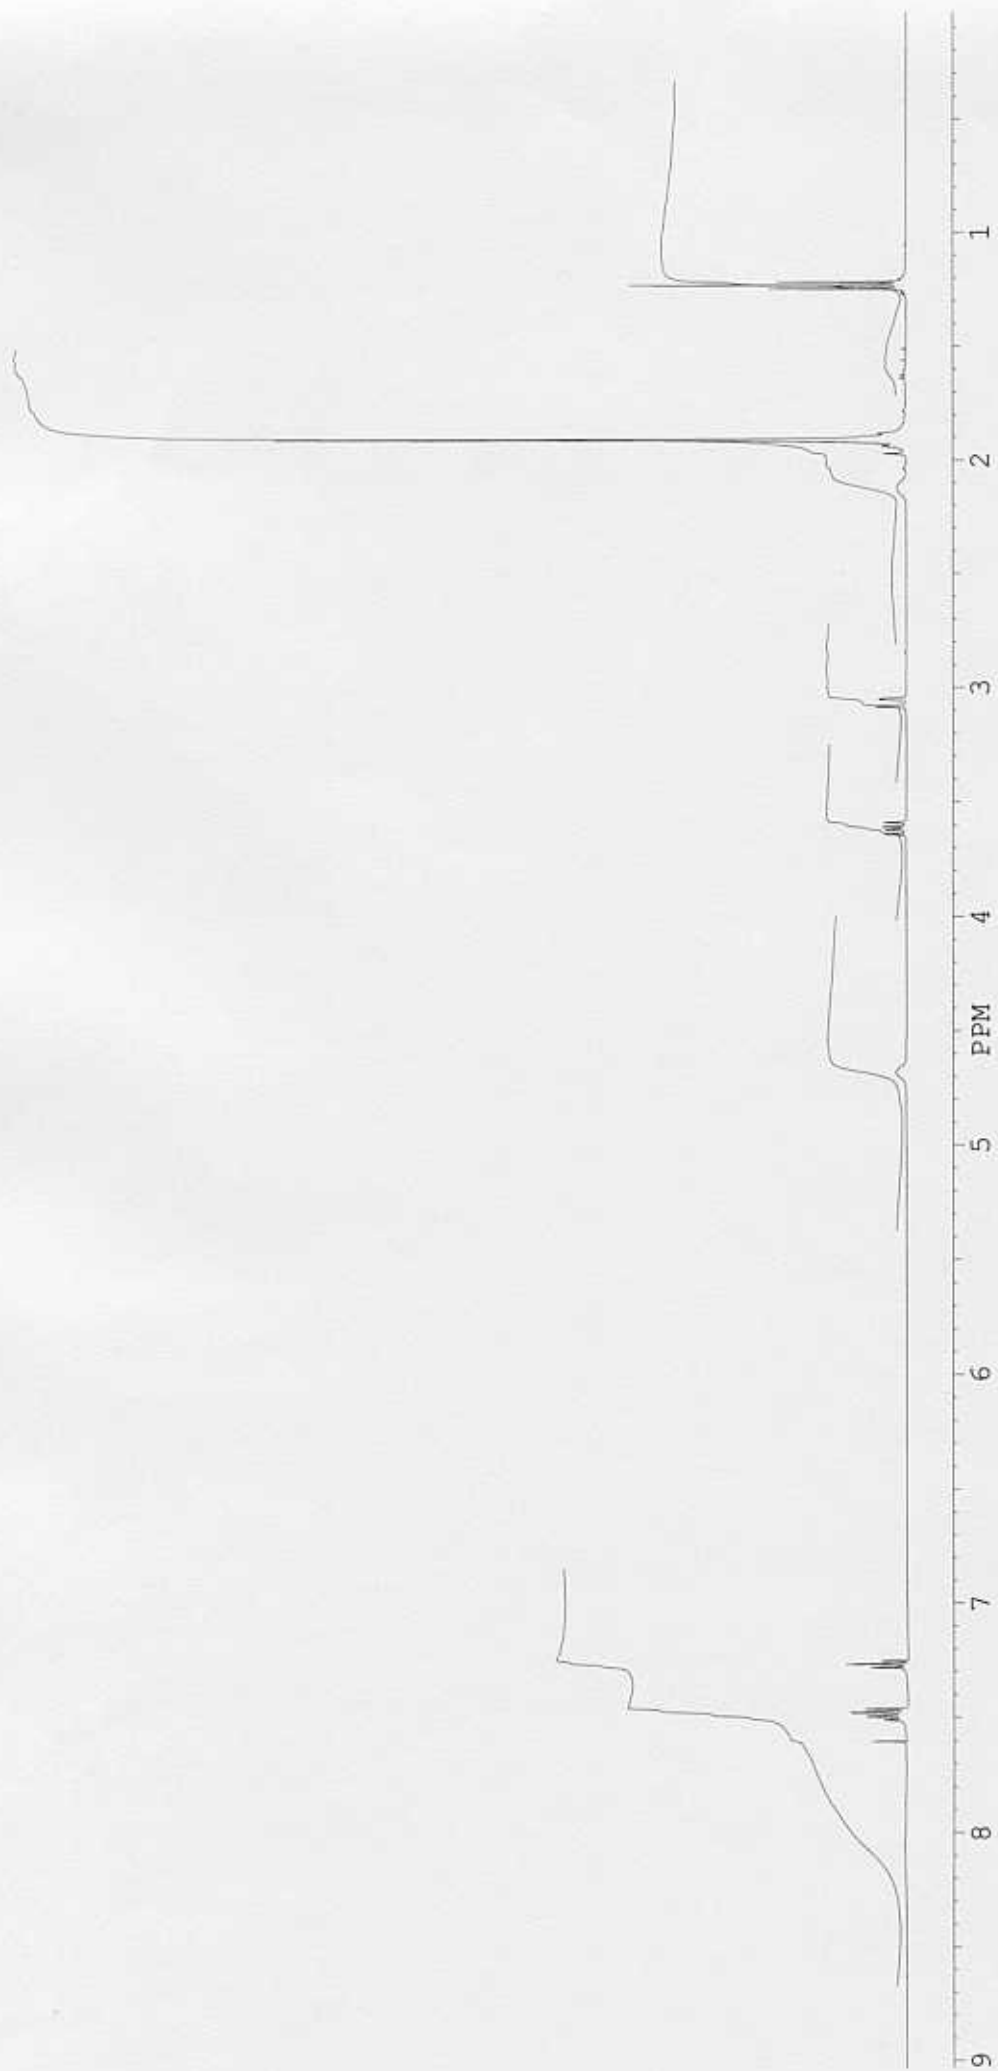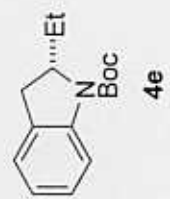

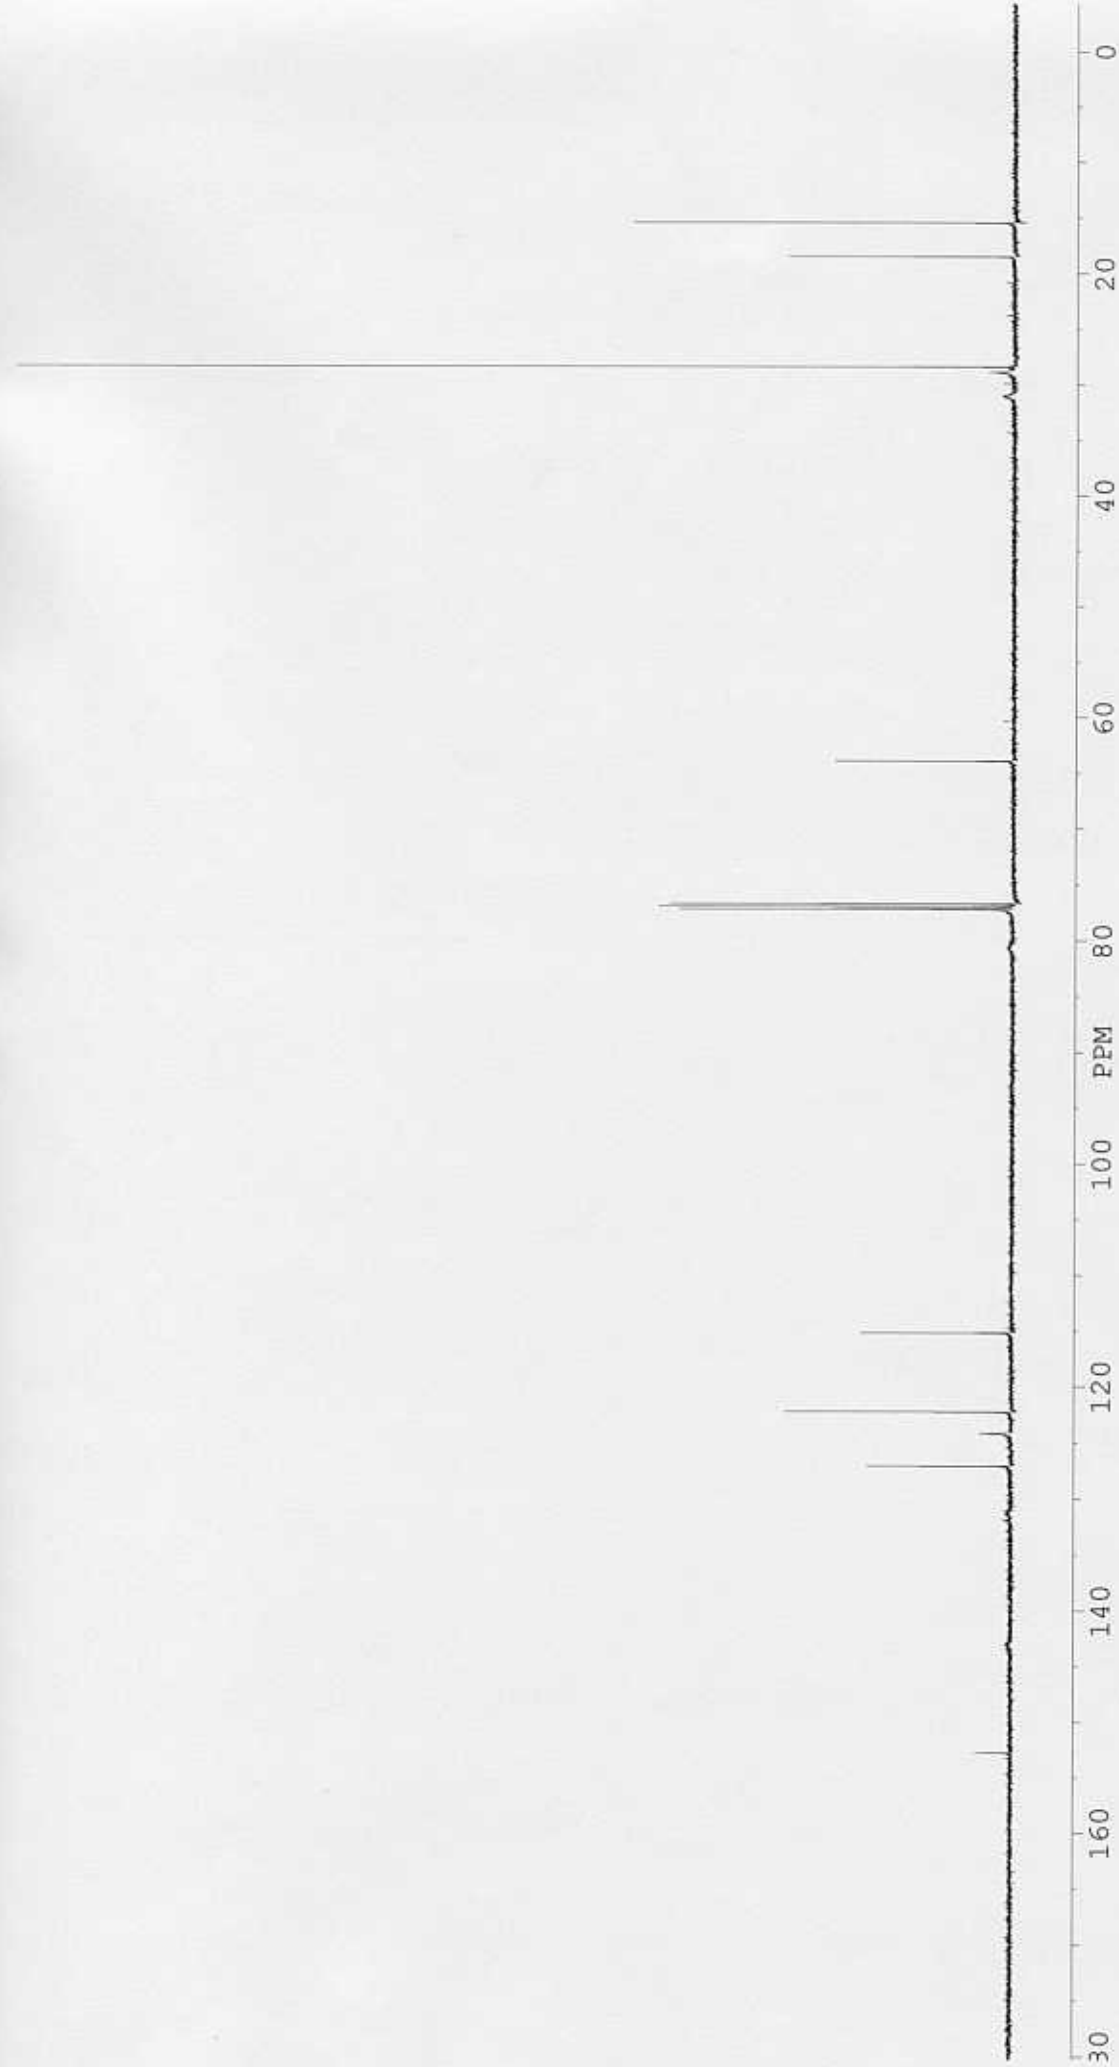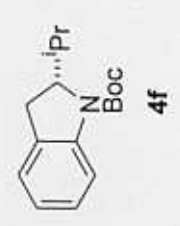

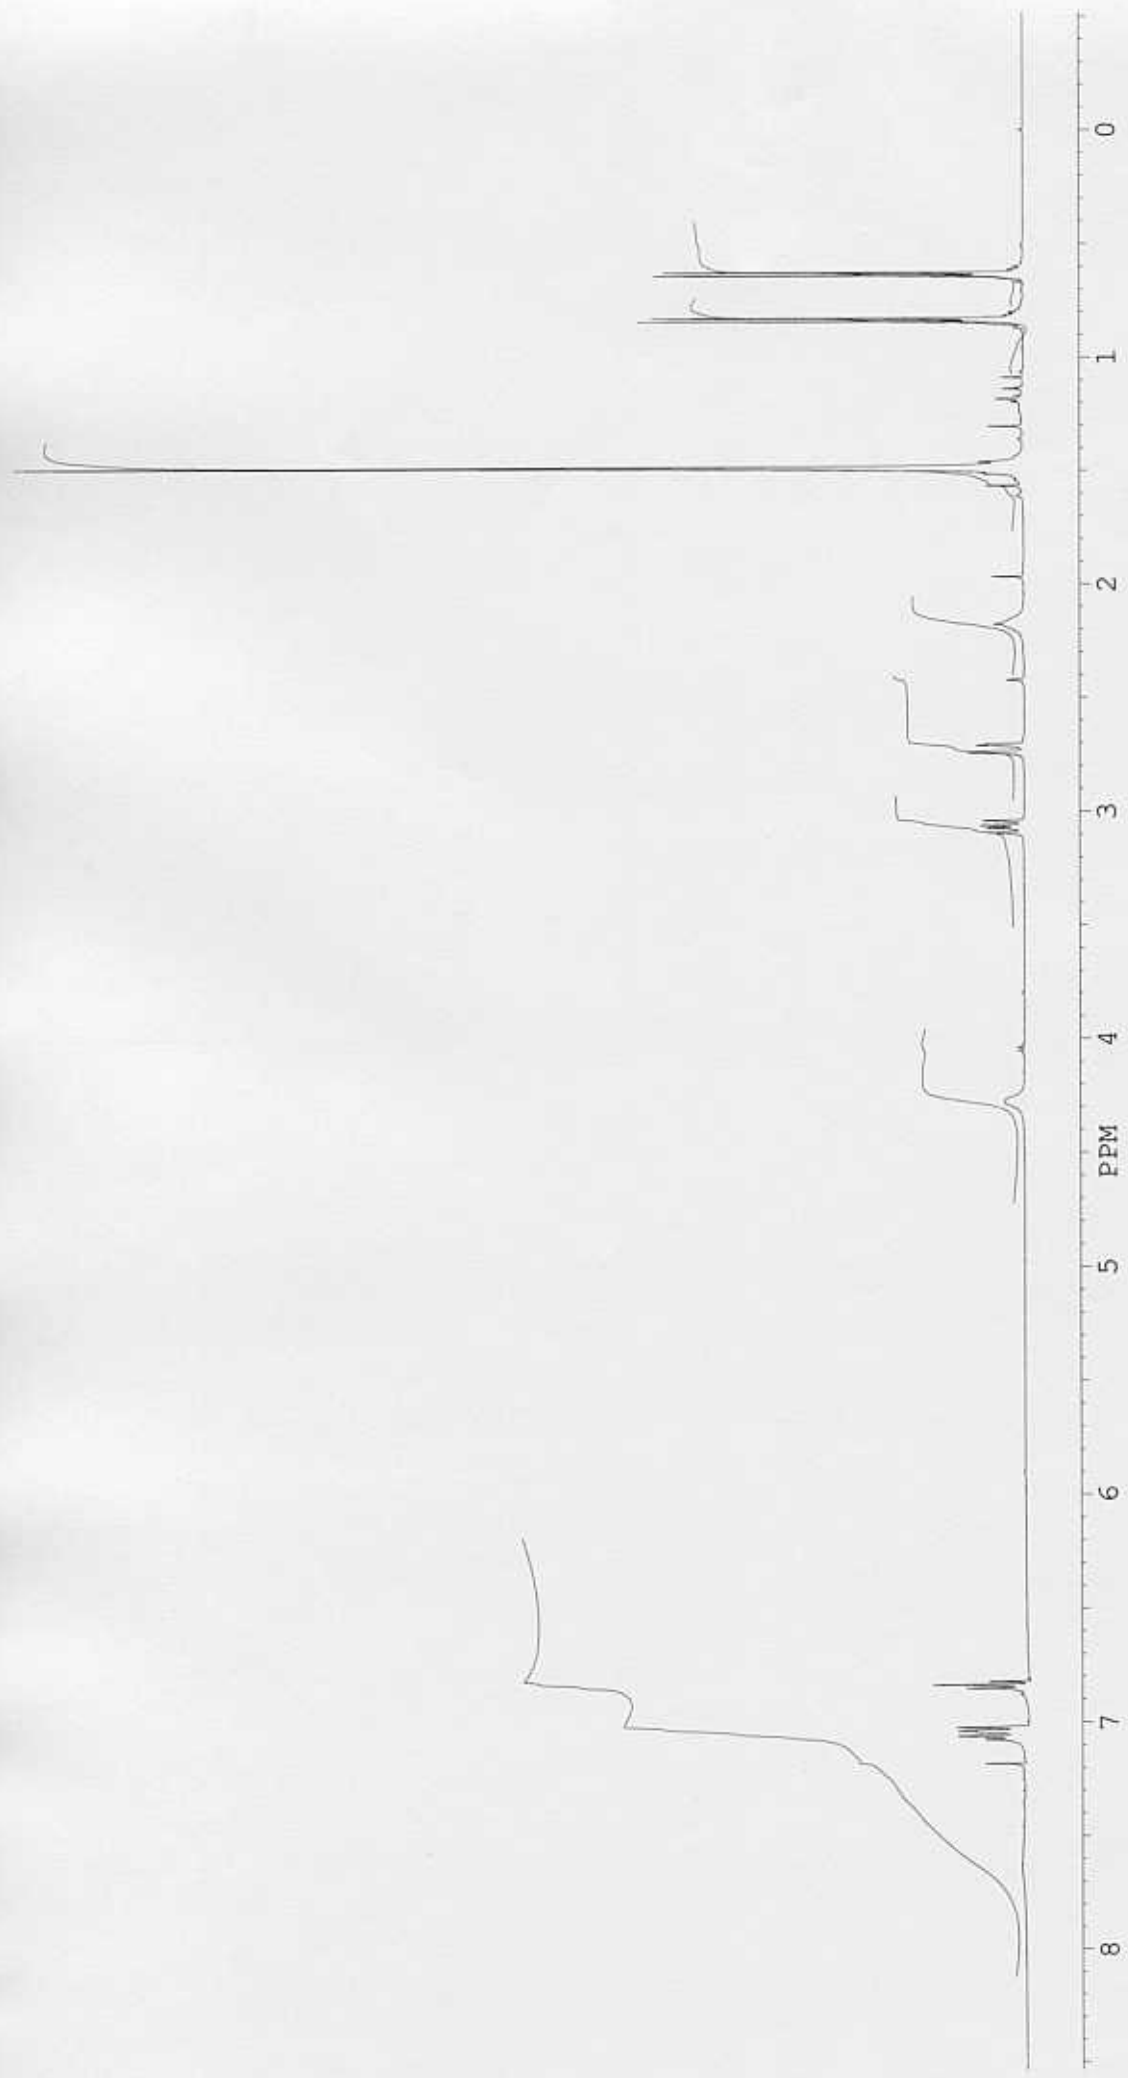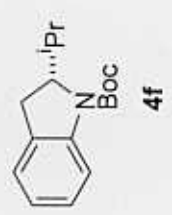



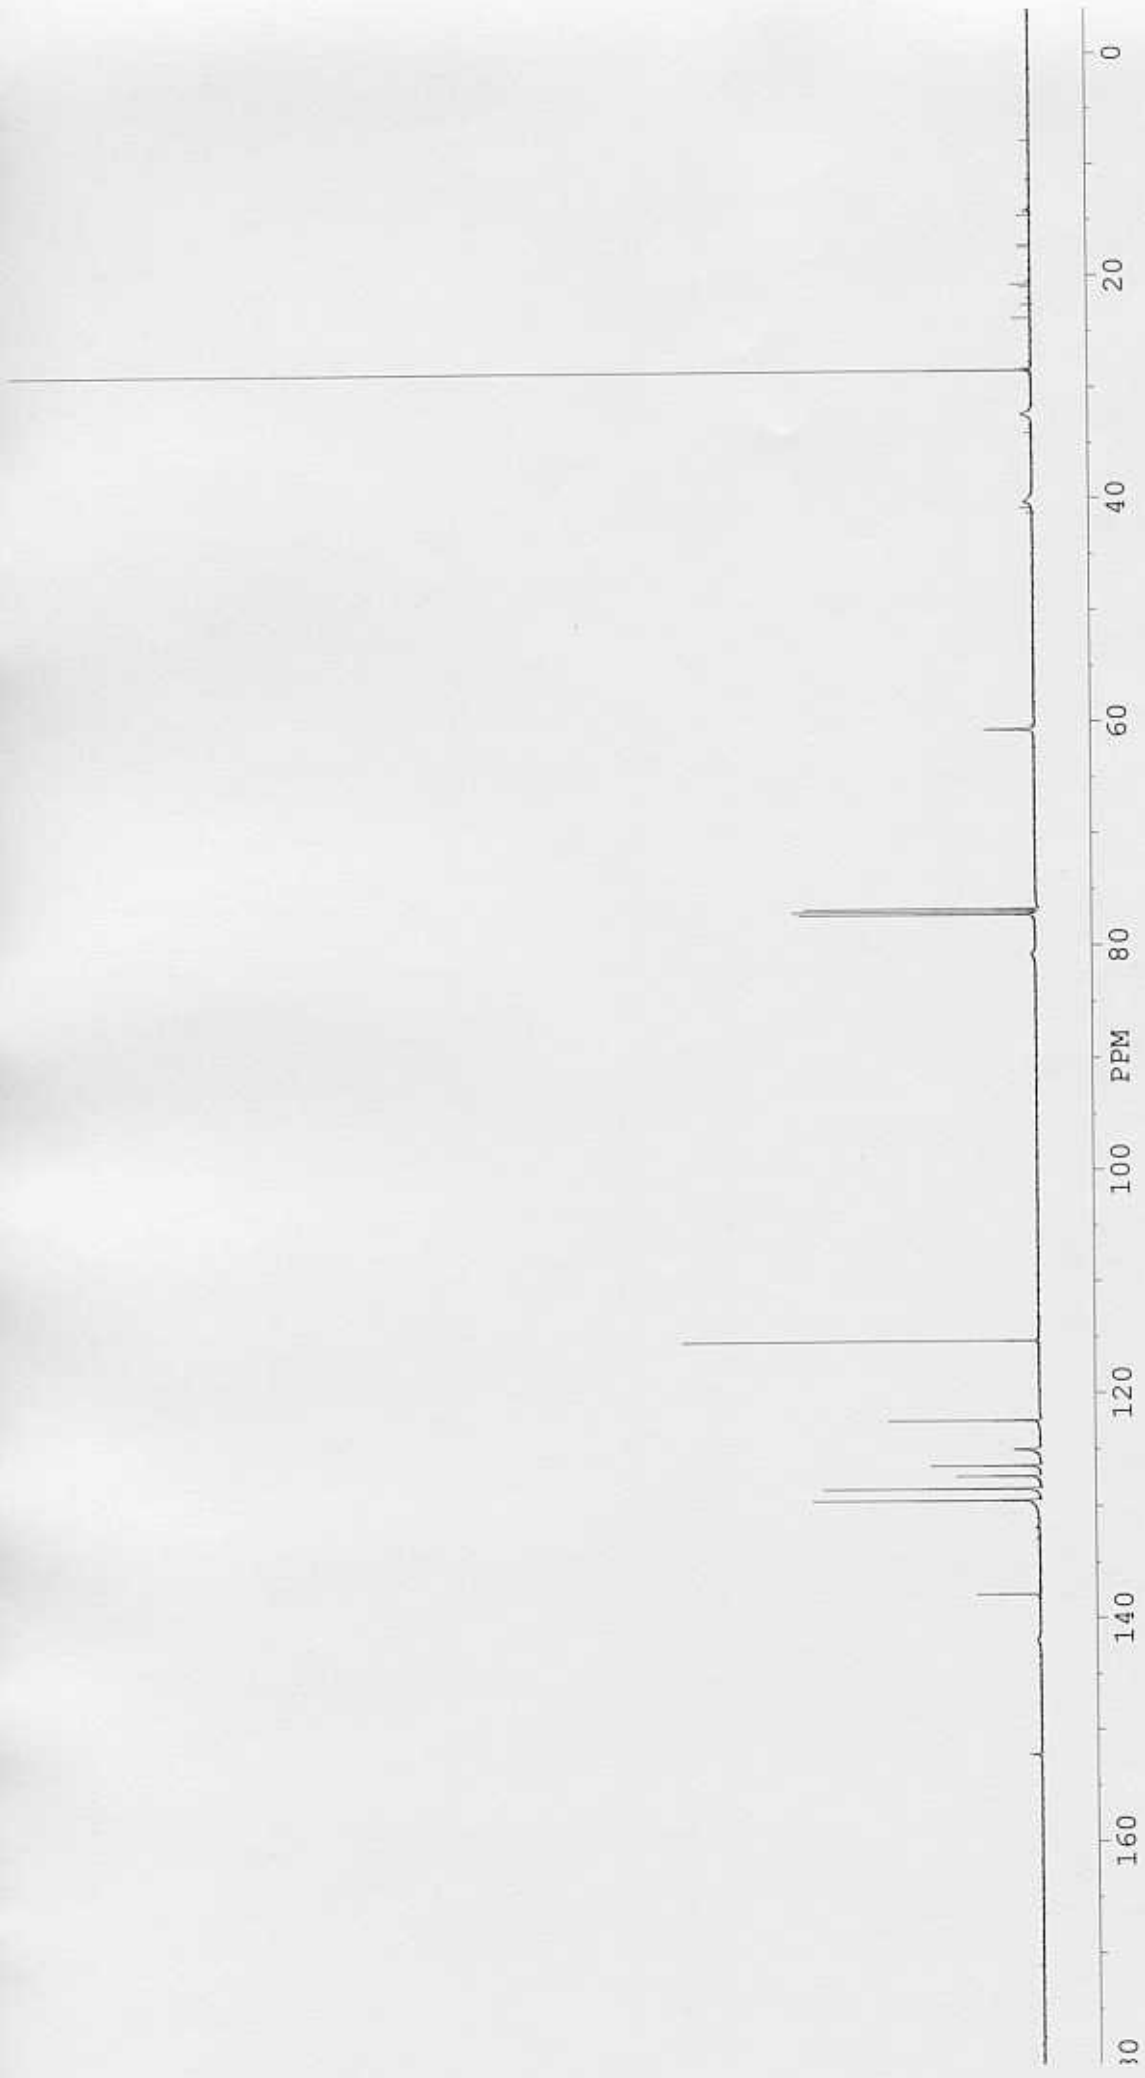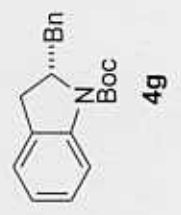

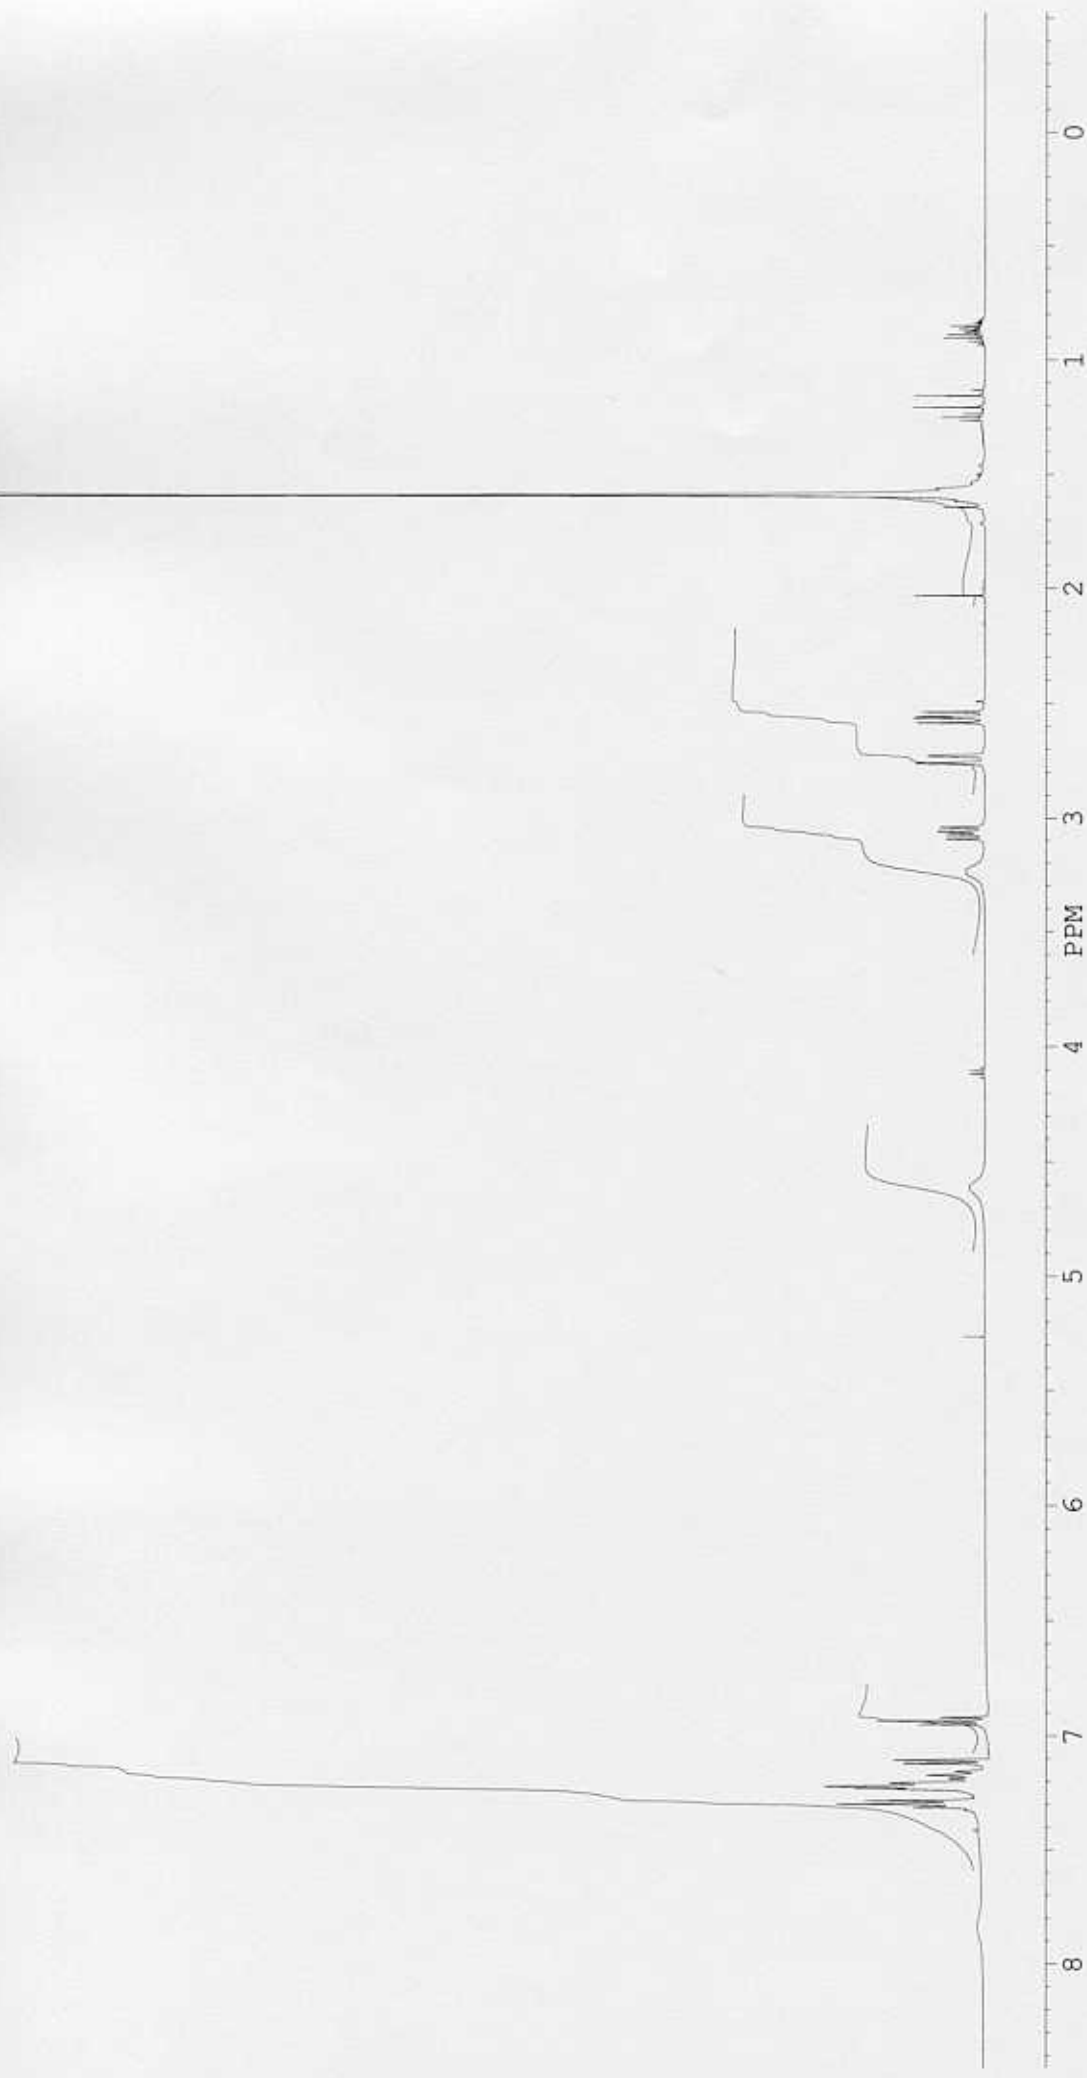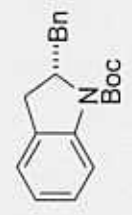

4g

Supplement: b200163b.pdf [file b200163b.pdf]
